# Supplementary material for: 2,5-Diketopiperazine Derivatives as Potential Anti-Influenza (H5N2) Agents: Synthesis, Biological Evaluation, and Molecular Docking Study
Source: MDPI journal article supplement (doi:10.3390/molecules27134200), 2022-06-29
Supplement: s1 [file s1]

*Supplementary Materials*

# **2,5-Diketopiperazine Derivatives as Potential Anti-Influenza (H5N2) Agents: Synthesis, Biological Evaluation, and Molecular Docking Study**

**Chanakan Winyakul <sup>1</sup>, Weerachai Phutdhawong <sup>2</sup>, Poomipat Tamdee <sup>1</sup>, Jitnapa Sirirak <sup>1</sup>, Thongchai Taechowisan <sup>3</sup> and Waya S. Phutdhawong <sup>1,\*</sup>**

<sup>1</sup> Department of Chemistry, Faculty of Science, Silpakorn University, Nakorn Pathom 73000, Thailand; chanakanwnkn@gmail.com (C.W.), tamdee\_p@silpakorn.edu (P.T.), jitnapasirirak@gmail.com (J.S.)

<sup>2</sup> Department of Chemistry, Faculty of Liberal Arts and Science, Kasetsart University, Kamphaengsaen Campus, Nakorn Pathom 73140, Thailand; phutdhawong@gmail.com

<sup>3</sup> Department of Microbiology, Faculty of Science, Silpakorn University, Nakorn Pathom 73000, Thailand; tewson84@hotmail.com

\* Correspondence: phutdhawong\_w@su.ac.th; Tel.: +66-34-255797

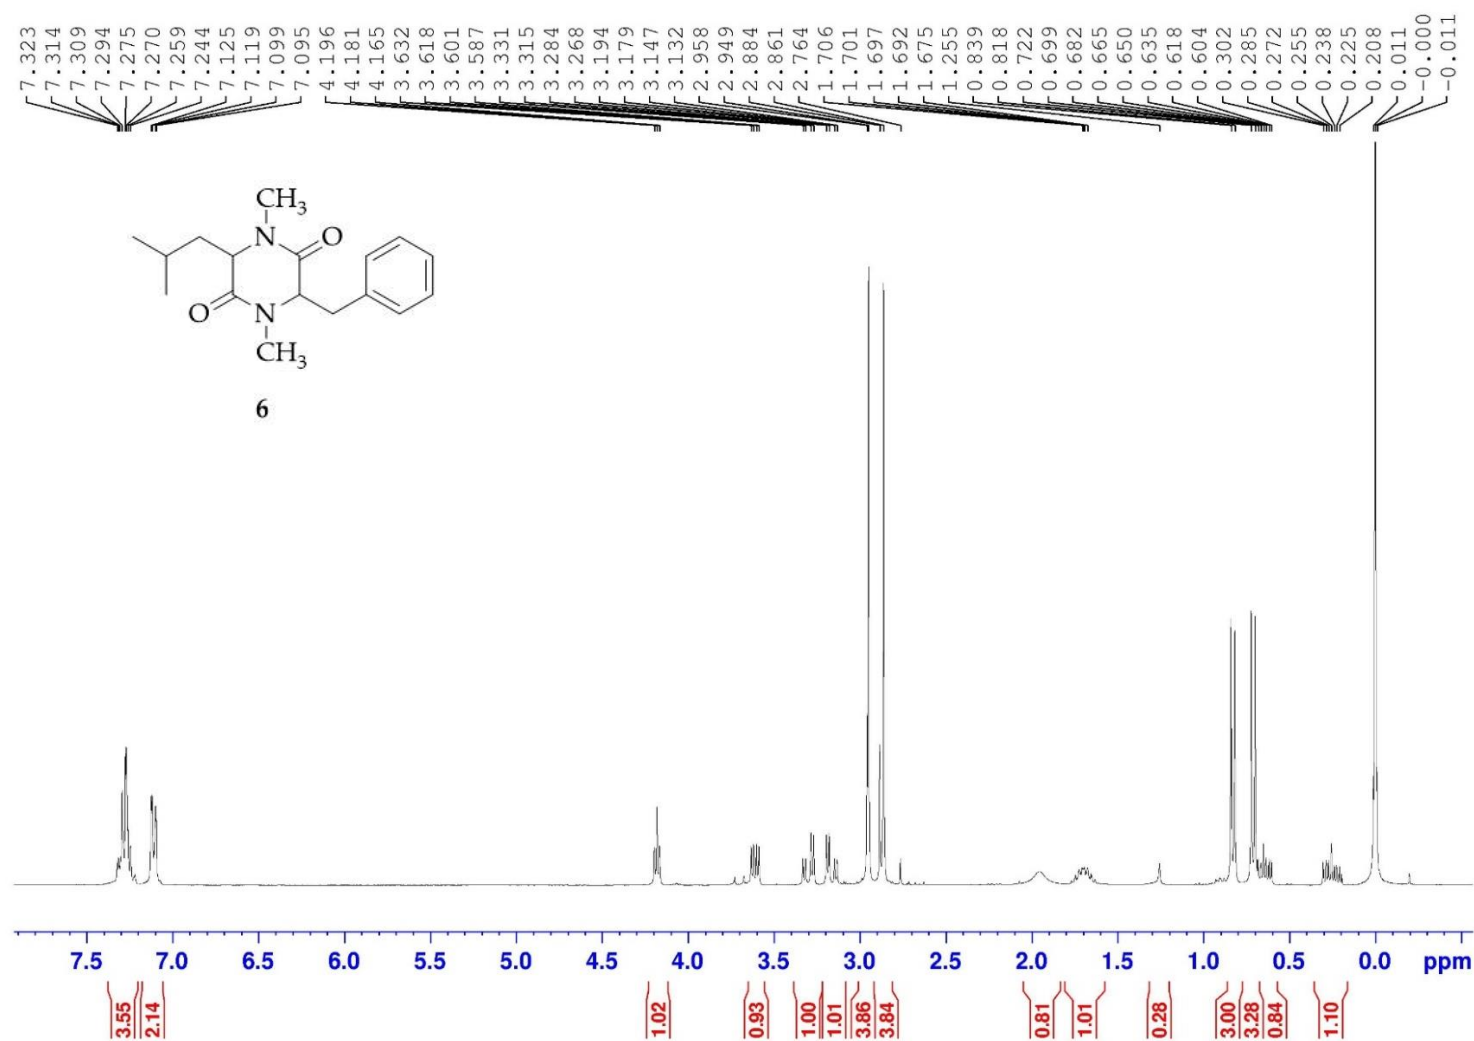

Figure S1. <sup>1</sup>H-NMR of the (3*S*,6*S*)-3-Benzyl-6-isobutyl-1,4-dimethyl-2,5-diketopiperazine (6).

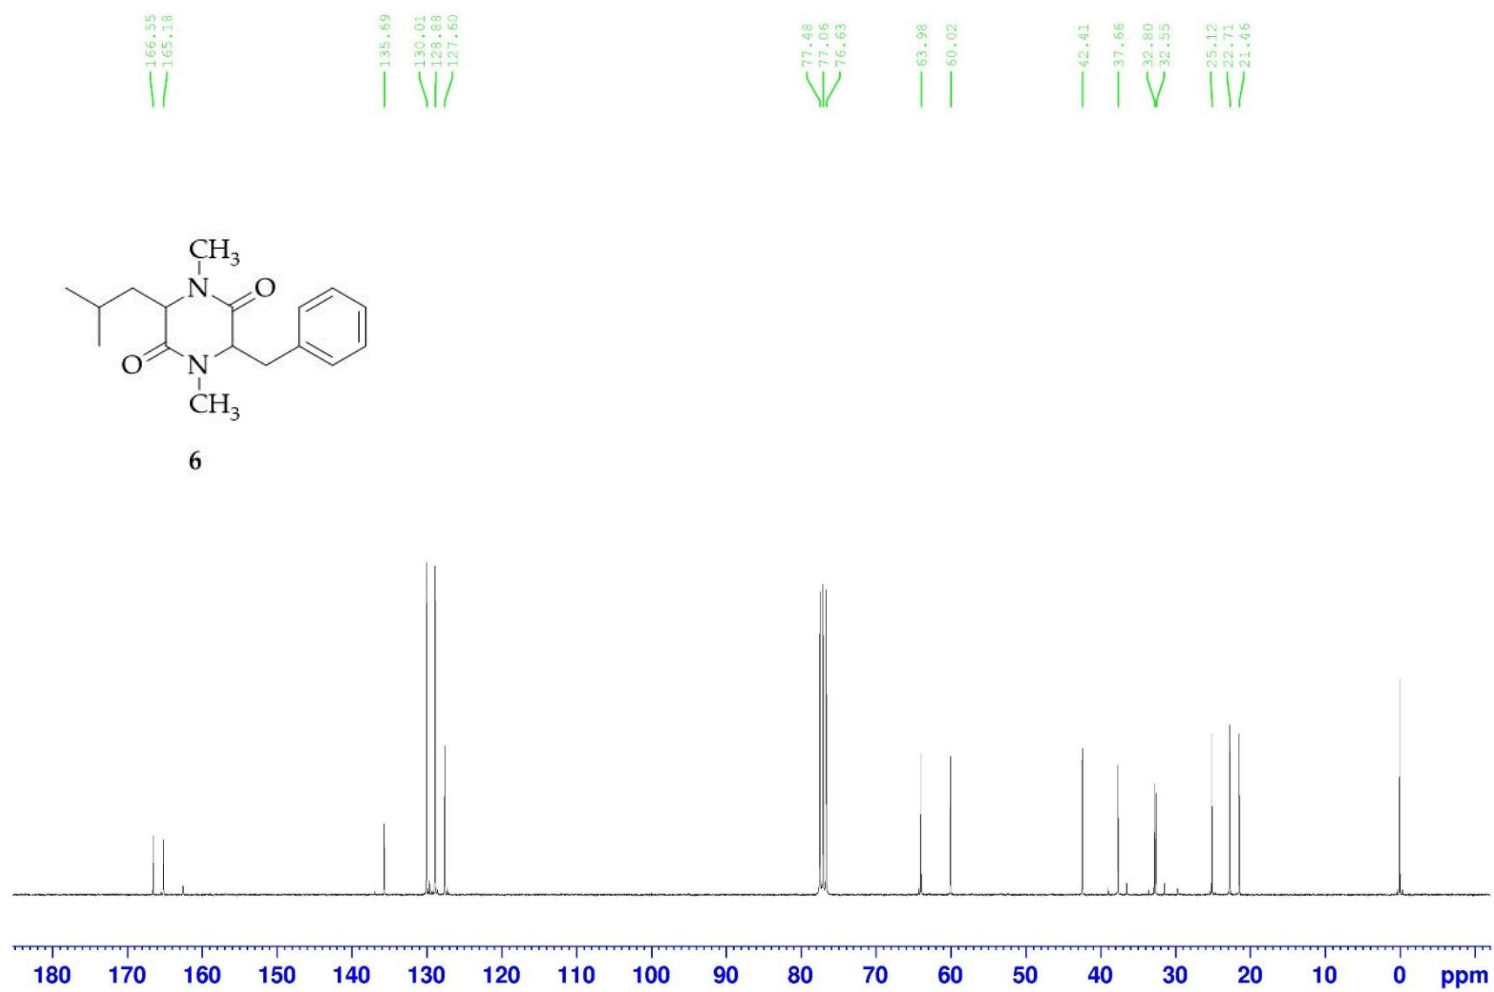

**Figure S2.** <sup>13</sup>C-NMR of the (3*S*,6*S*)-3-Benzyl-6-isobutyl-1,4-dimethyl-2,5-diketopiperazine (6).

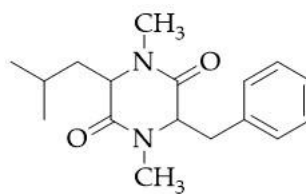

6

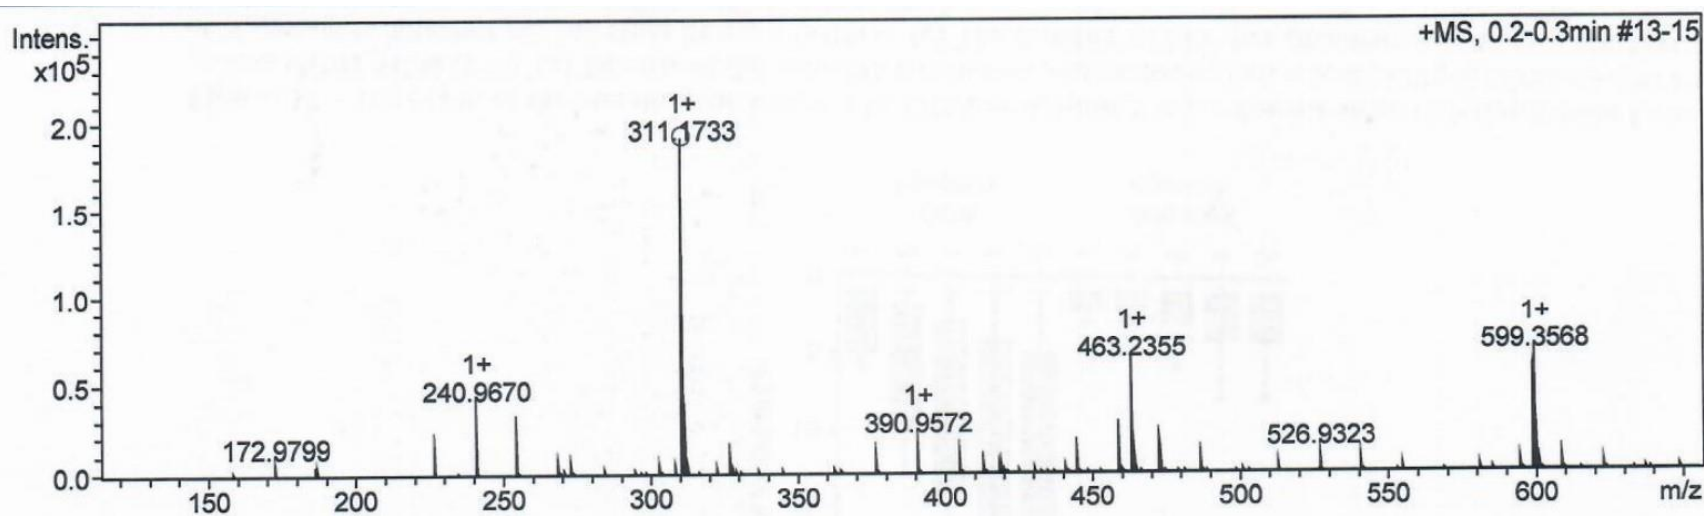

**Figure S3.** HRMS of the (3*S*,6*S*)-3-Benzyl-6-isobutyl-1,4-dimethyl-2,5-diketopiperazine (**6**).

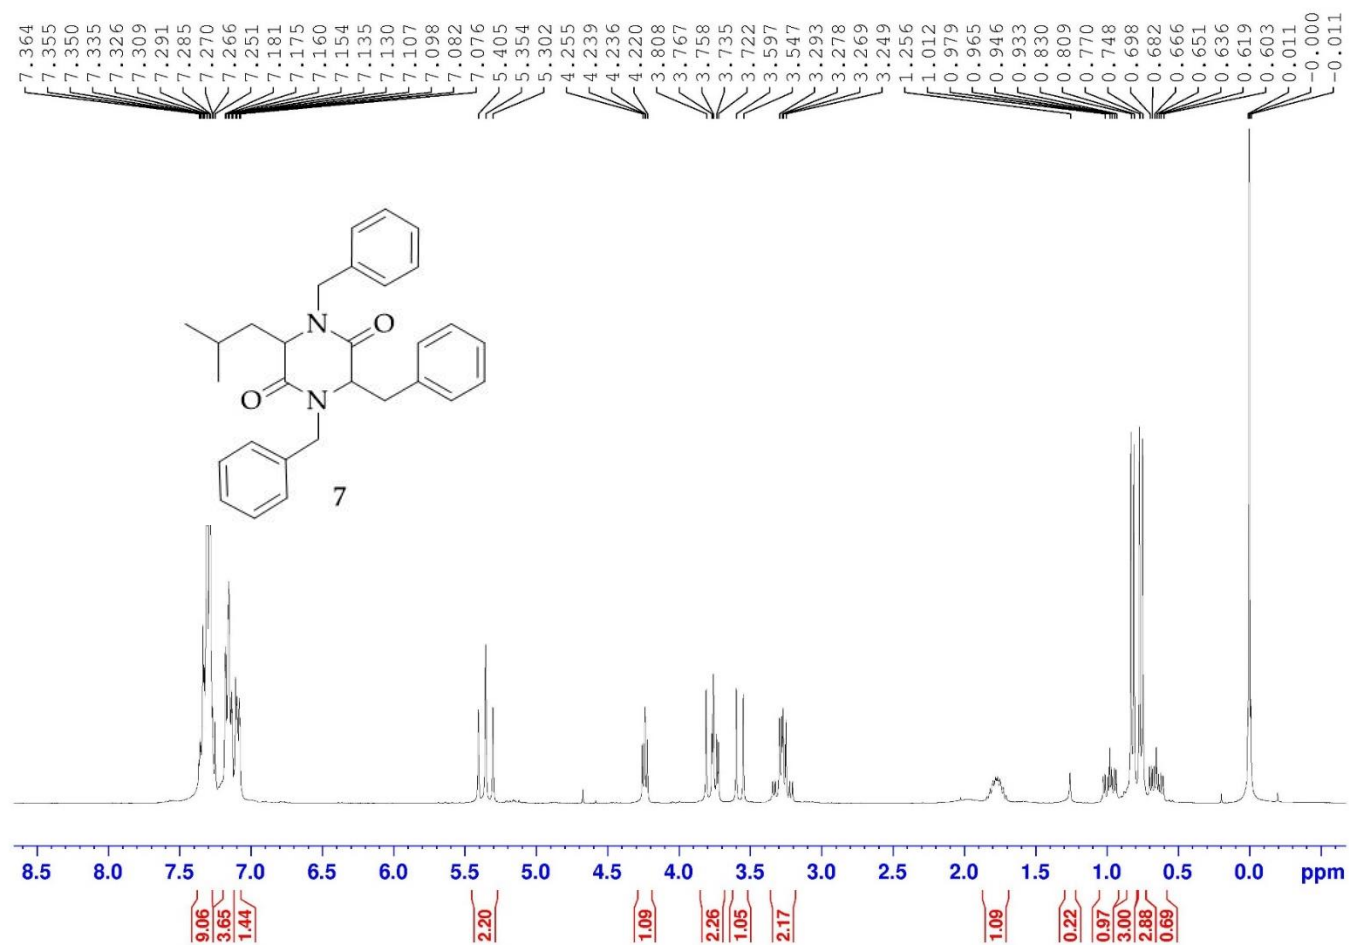

**Figure S4.** <sup>1</sup>H-NMR of the (3S,6S)-1,3,4-Tribenzyl-6-isobutyl-2,5-diketopiperazine (7).

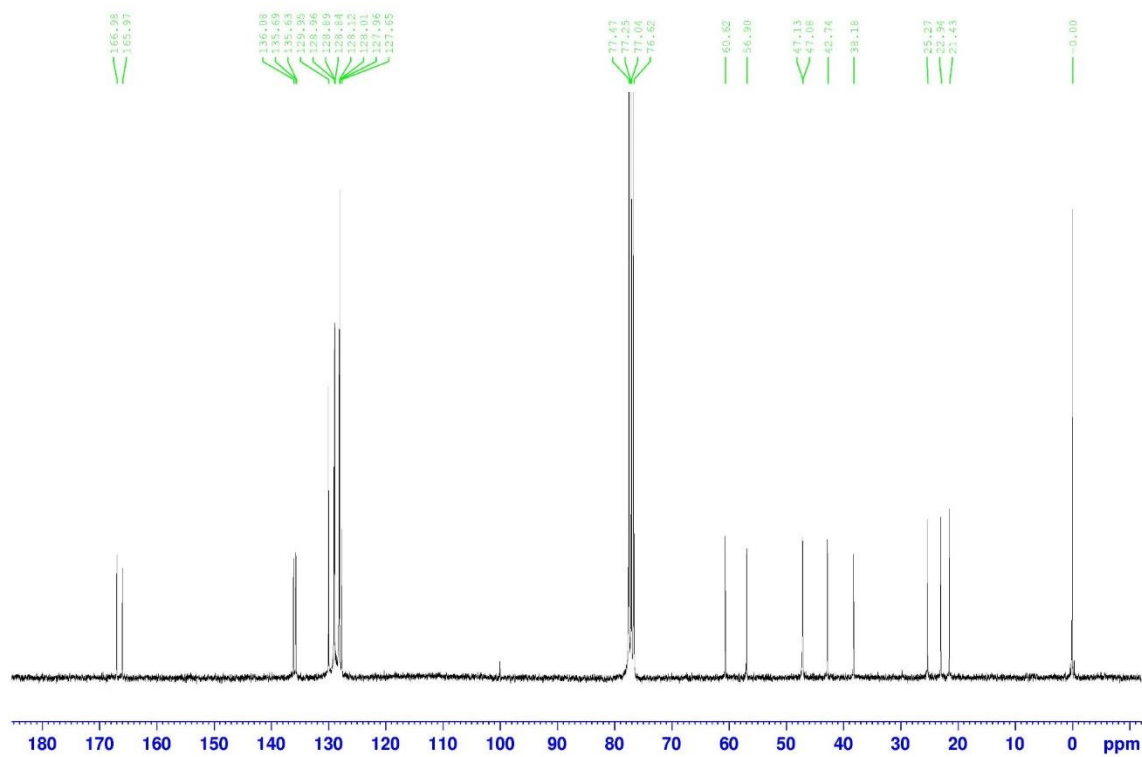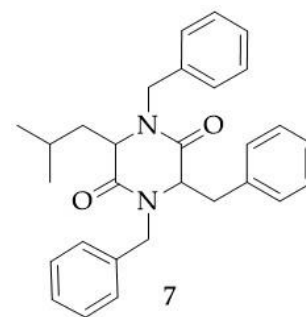

**Figure S5.**  $^{13}\text{C}$ -NMR of the (3*S*,6*S*)-1,3,4-Tribenzyl-6-isobutyl-2,5-diketopiperazine (7).

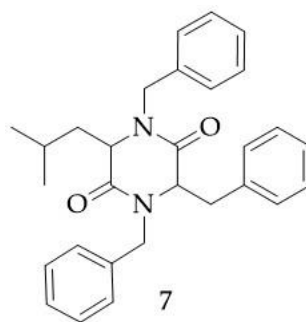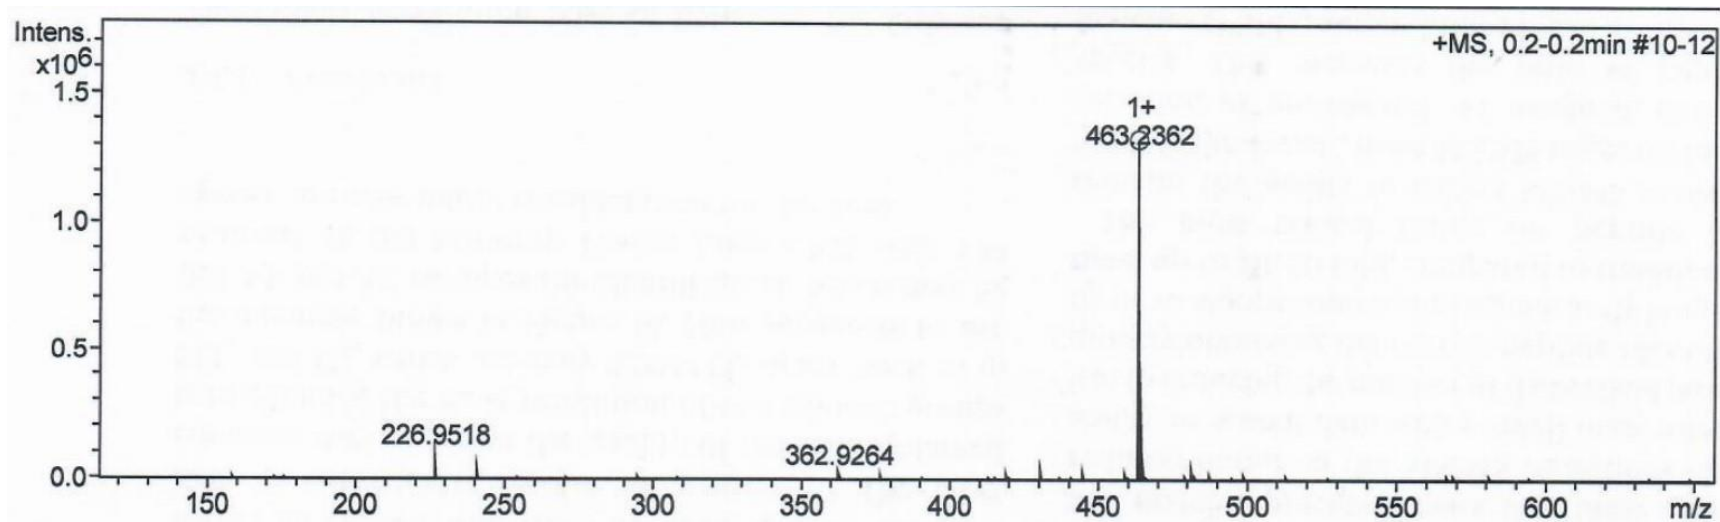

**Figure S6.** HRMS of the (3*S*,6*S*)-1,3,4-Tribenzyl-6-isobutyl-2,5-diketopiperazine (7).

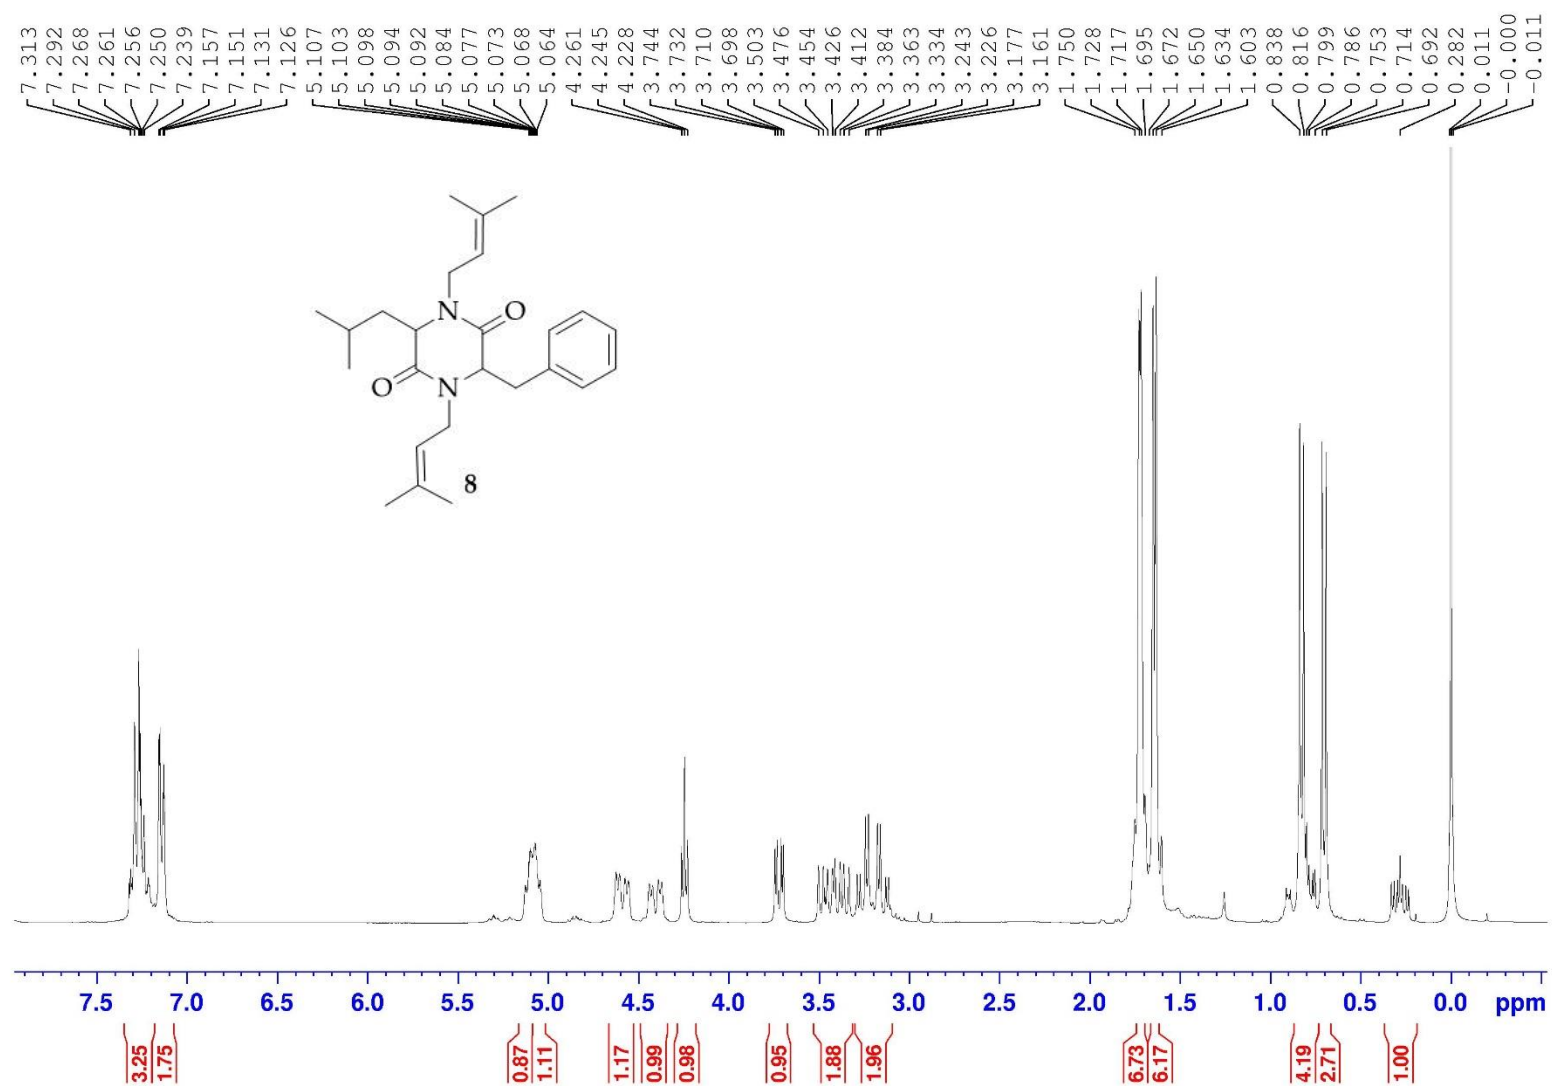

**Figure S7.** <sup>1</sup>H-NMR of the (3*S*,6*S*)-3-Benzyl-6-isobutyl-1,4-bis(3-methylbut-2-en-1-yl)-2,5-diketopiperazine (8).



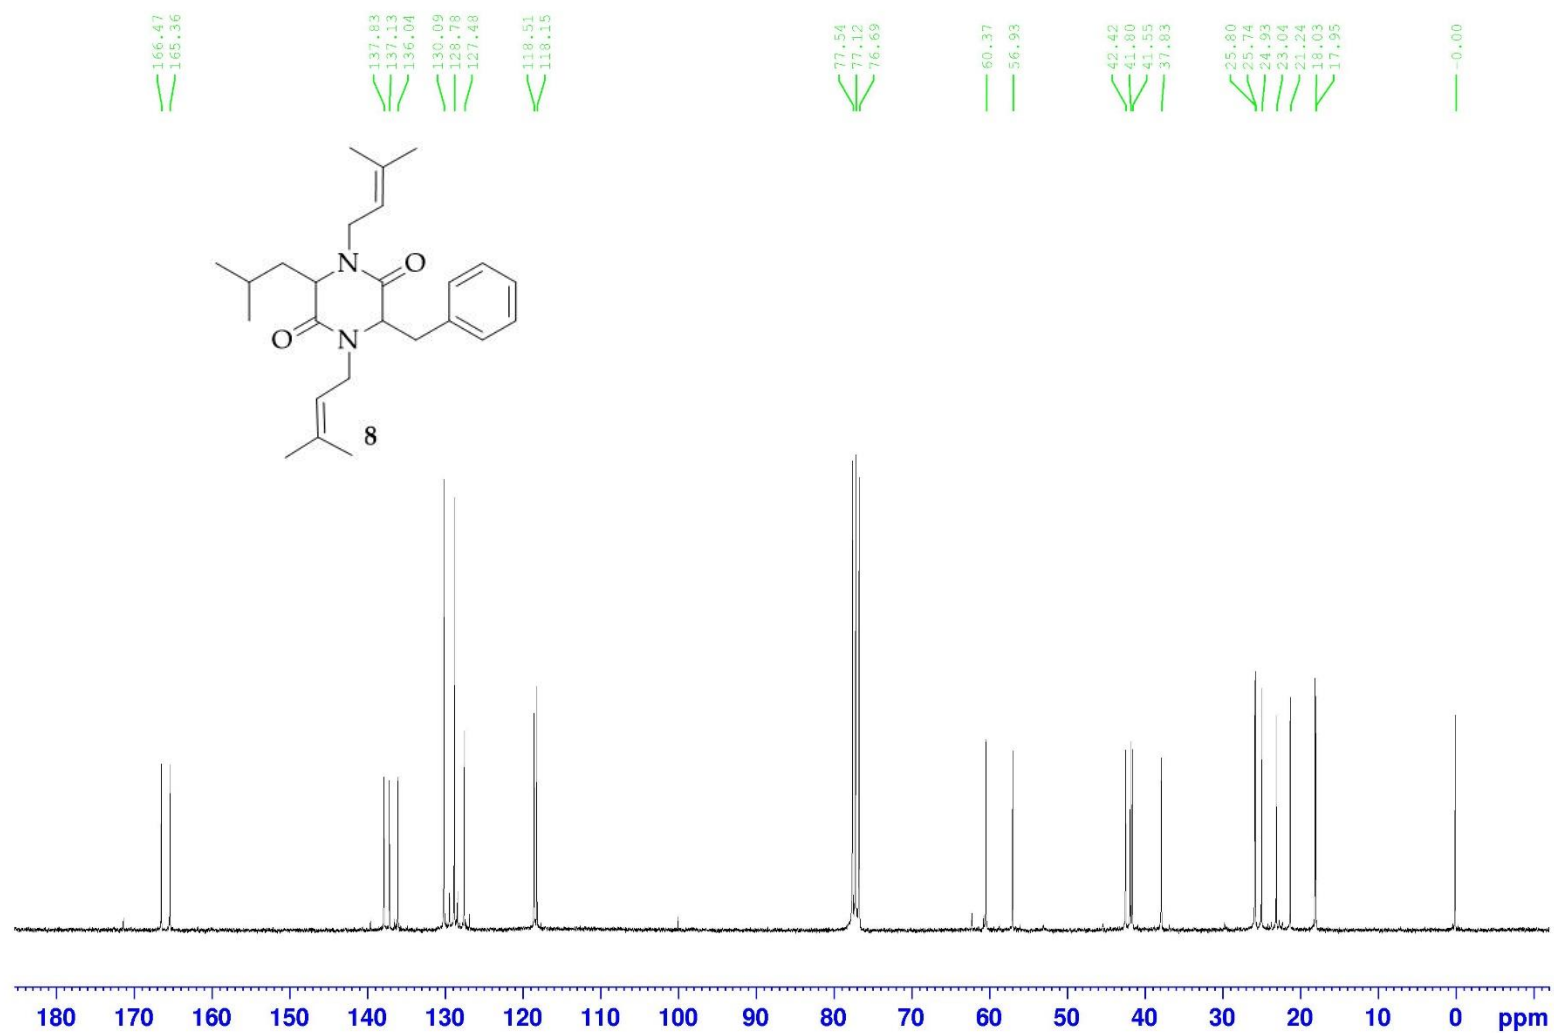

**Figure S8.** <sup>13</sup>C-NMR of the (3*S*,6*S*)-3-Benzyl-6-isobutyl-1,4-bis(3-methylbut-2-en-1-yl)-2,5-diketopiperazine (8).

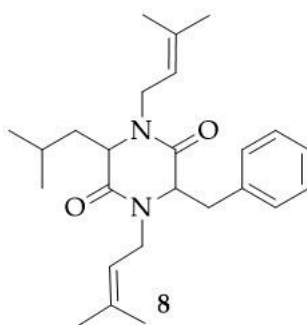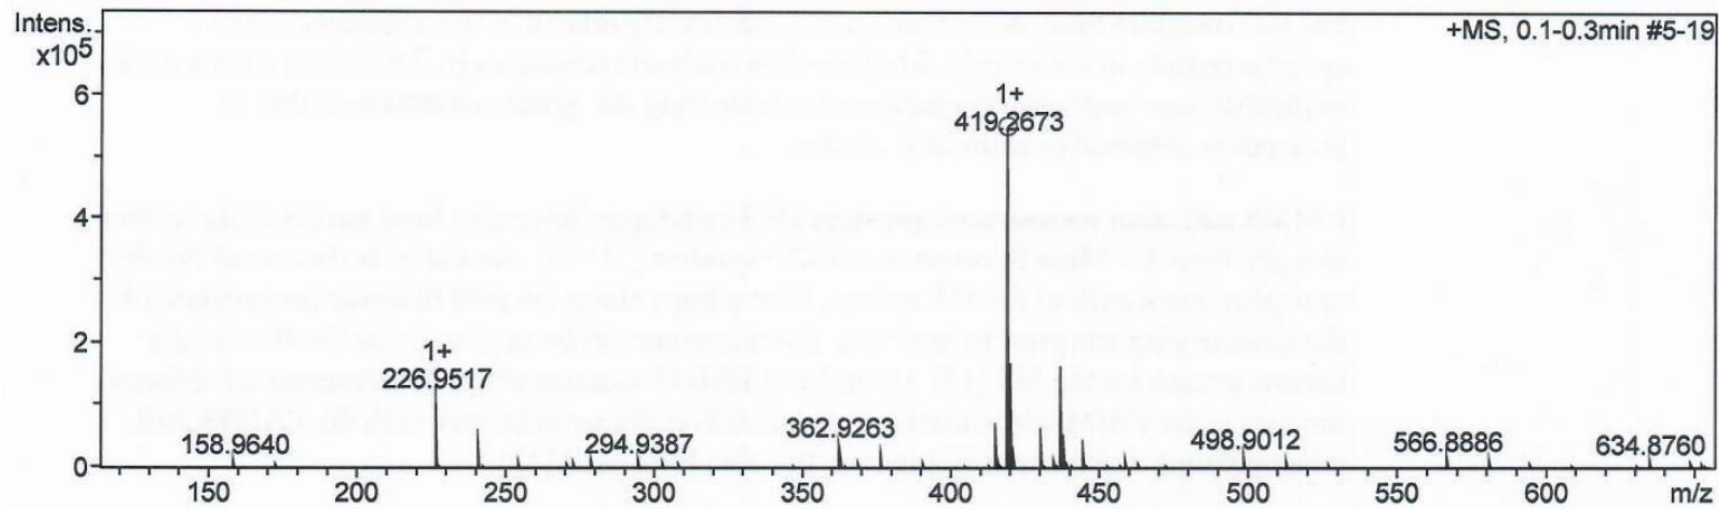

**Figure S9.** HRMS of the (3*S*,6*S*)-3-Benzyl-6-isobutyl-1,4-bis(3-methylbut-2-en-1-yl)-2,5-diketopiperazine (8).

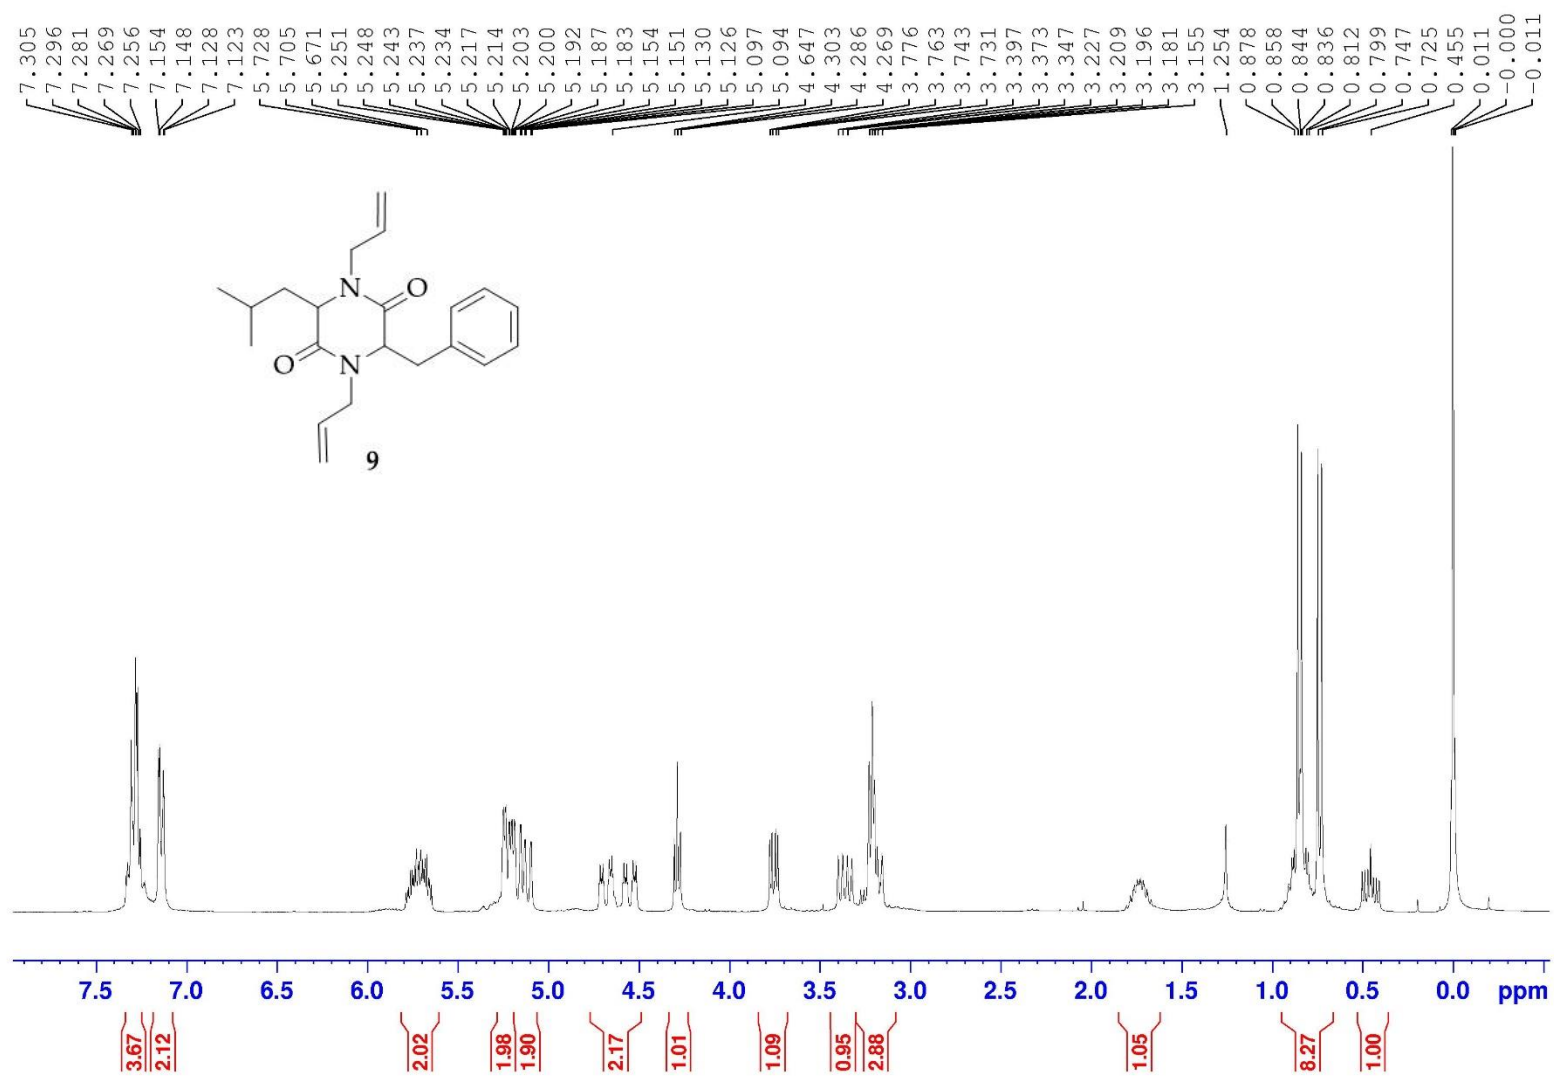

Figure S10. <sup>1</sup>H-NMR of the (3S,6S)-1,4-Diallyl-3-benzyl-6-isobutyl-2,5-diketopiperazine (9).

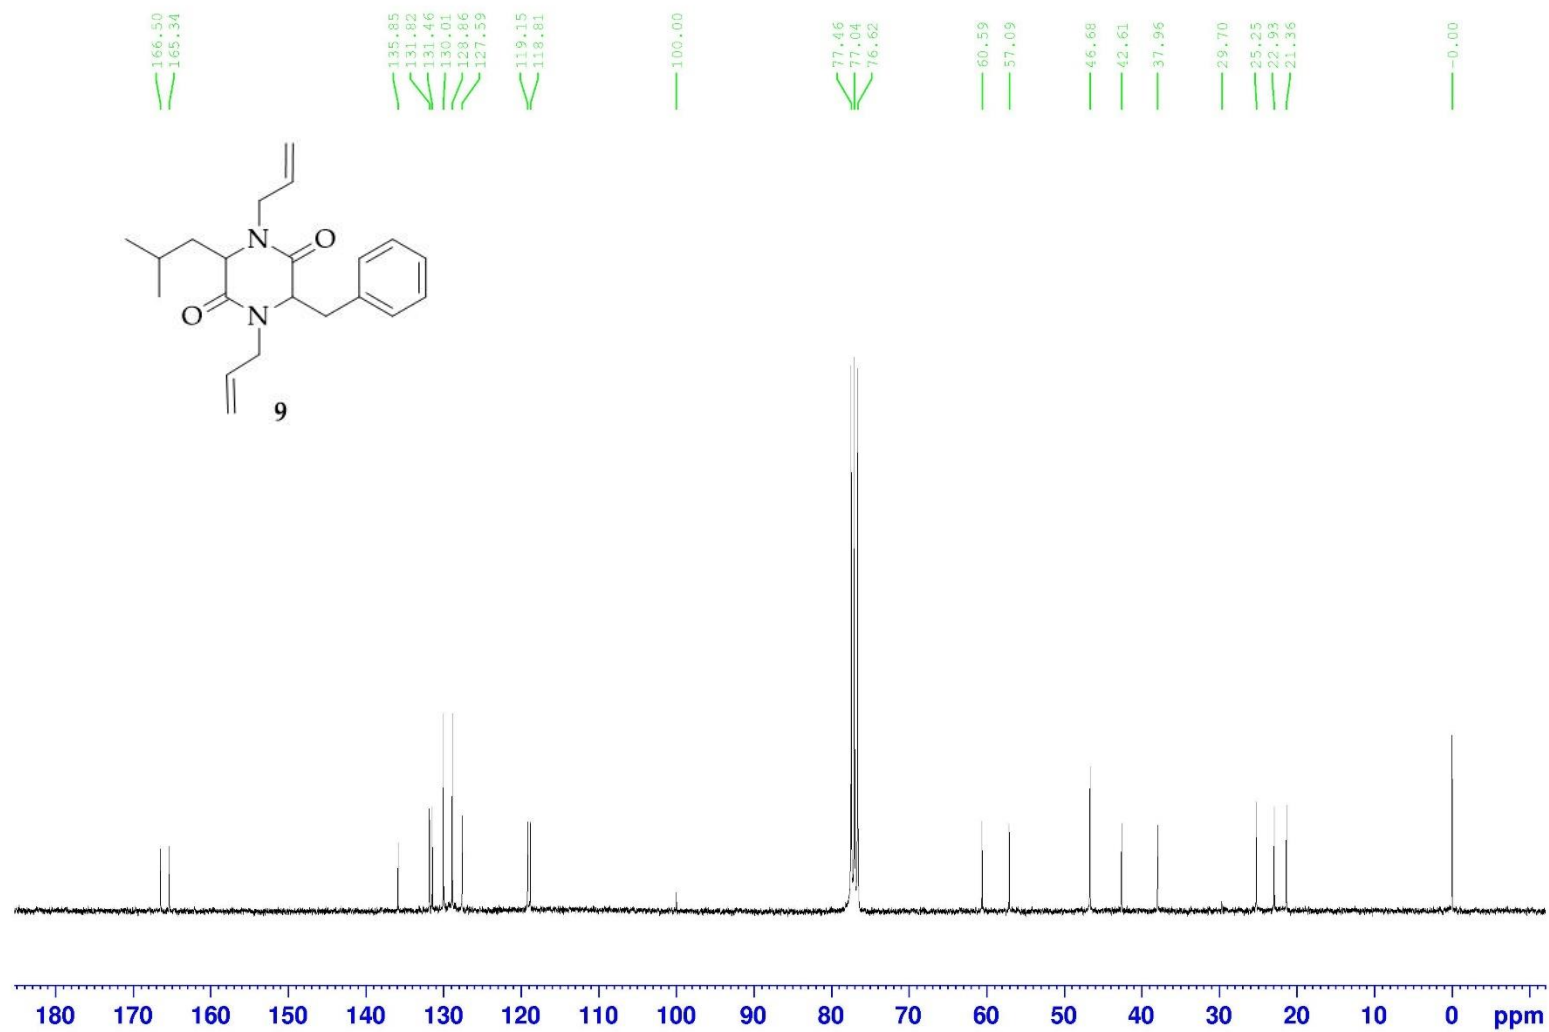

**Figure S11.** <sup>13</sup>C-NMR of the (3S,6S)-1,4-Diallyl-3-benzyl-6-isobutyl-2,5-diketopiperazine (9).

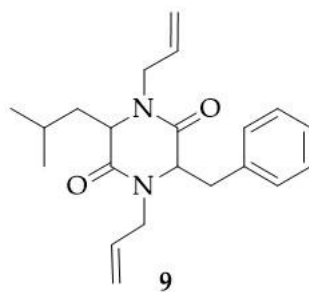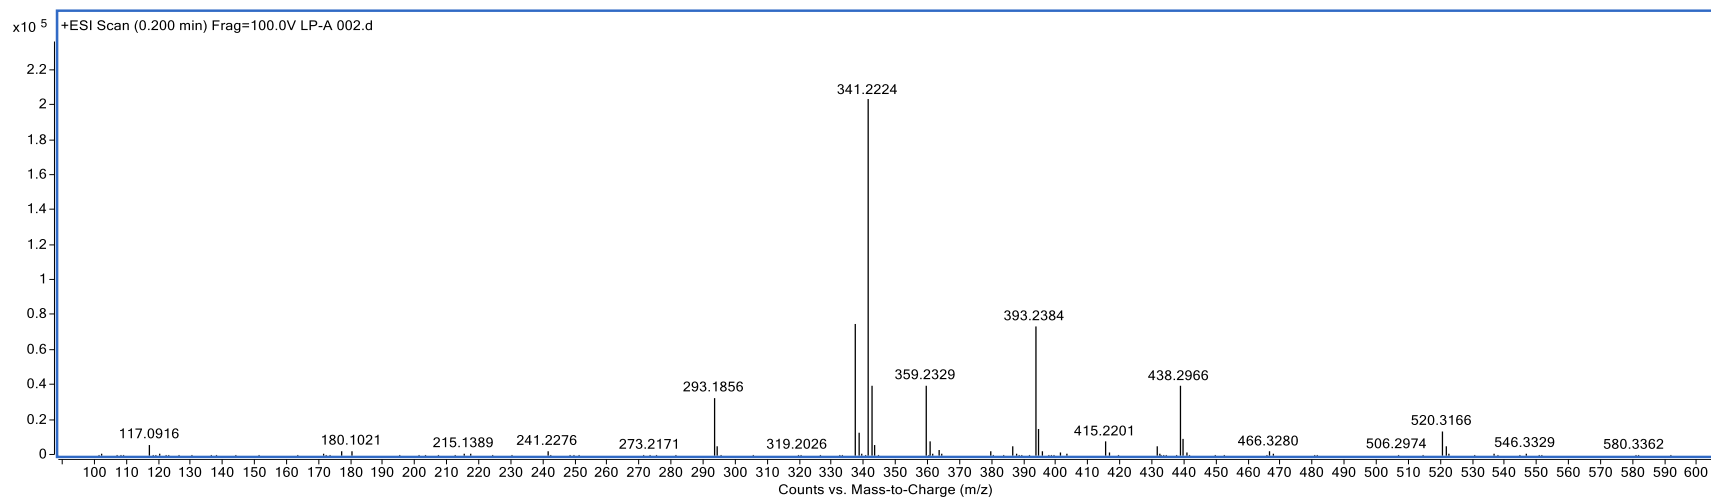

**Figure S12.** HRMS of the (3S,6S)-1,4-Diallyl-3-benzyl-6-isobutyl-2,5-diketopiperazine (**9**).

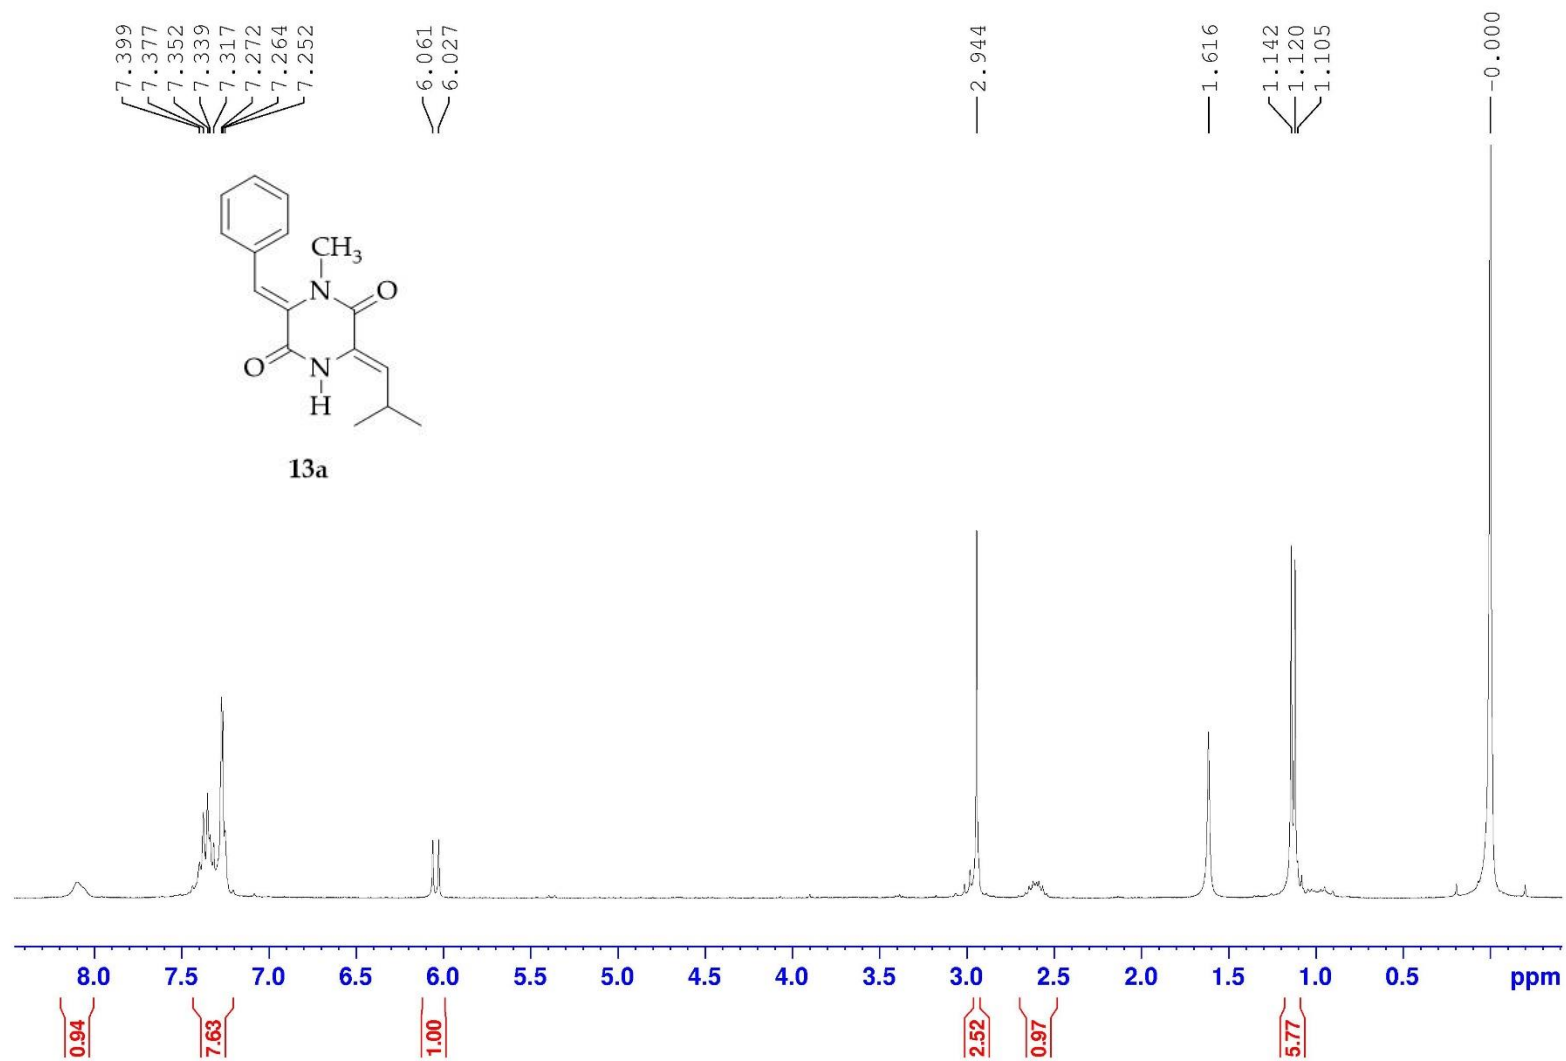

**Figure S13.** <sup>1</sup>H-NMR of the (3Z,6Z)-3-Benzylidene-6-(2-methylpropylidene)-4-methyl-2,5-diketopiperazine (**13a**).

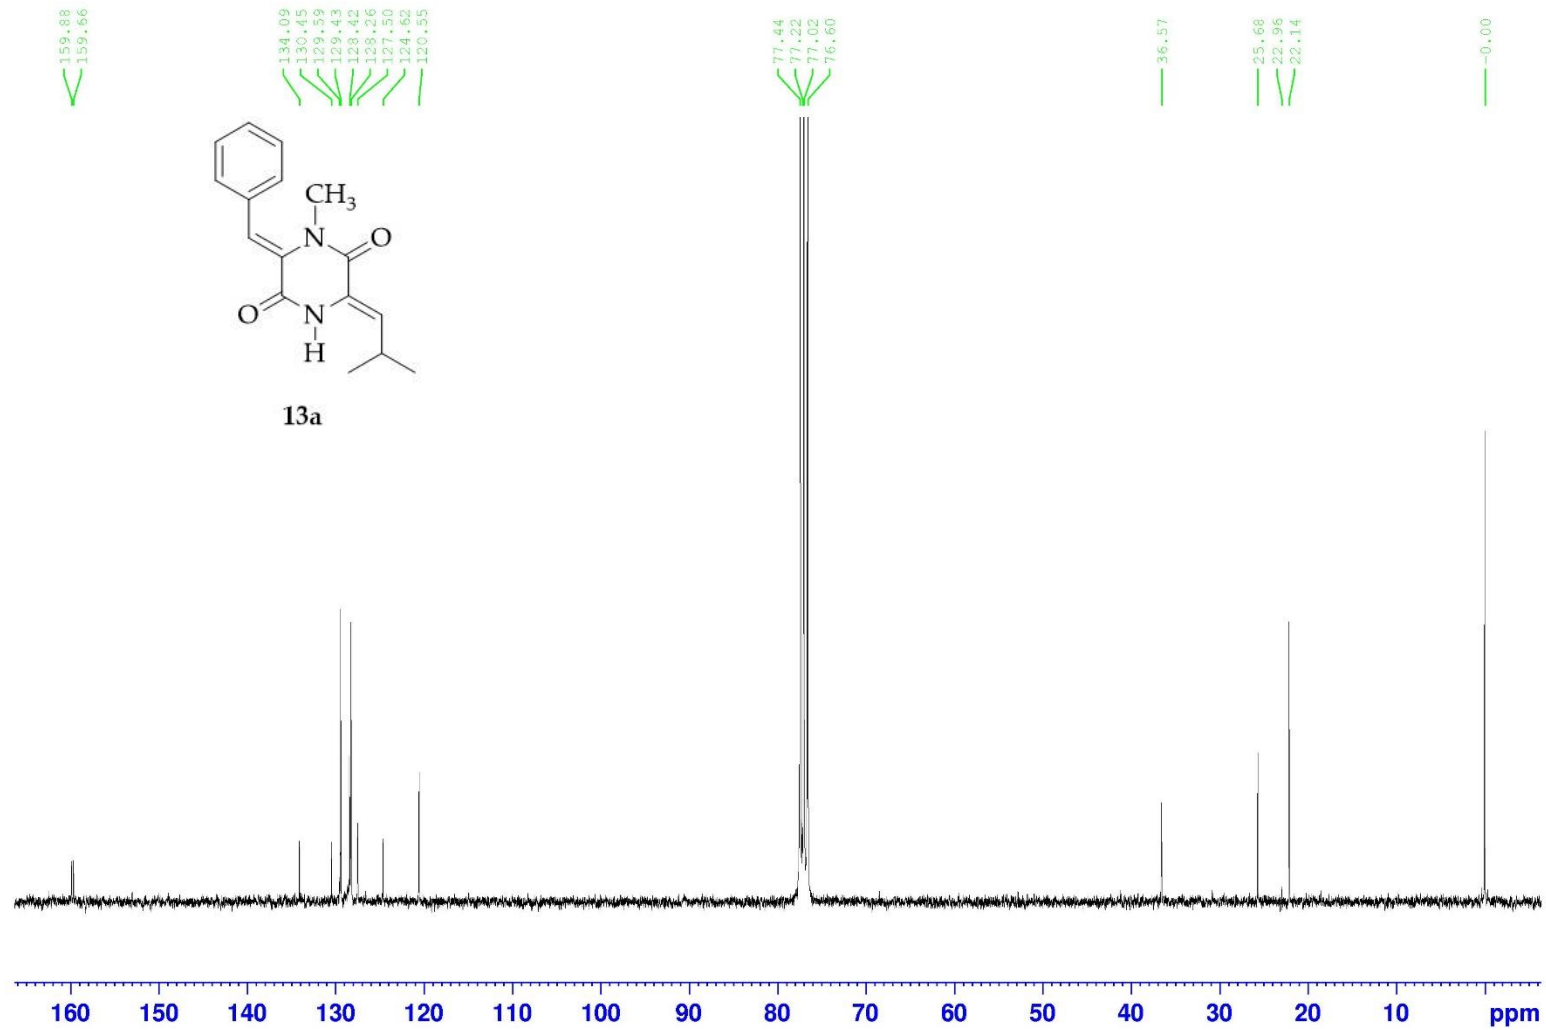

**Figure S14.** <sup>13</sup>C-NMR of the (3Z,6Z)-3-Benzylidene-6-(2-methylpropylidene)-4-methyl-2,5-diketopiperazine (**13a**).

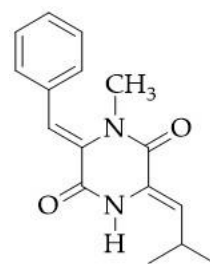

13a

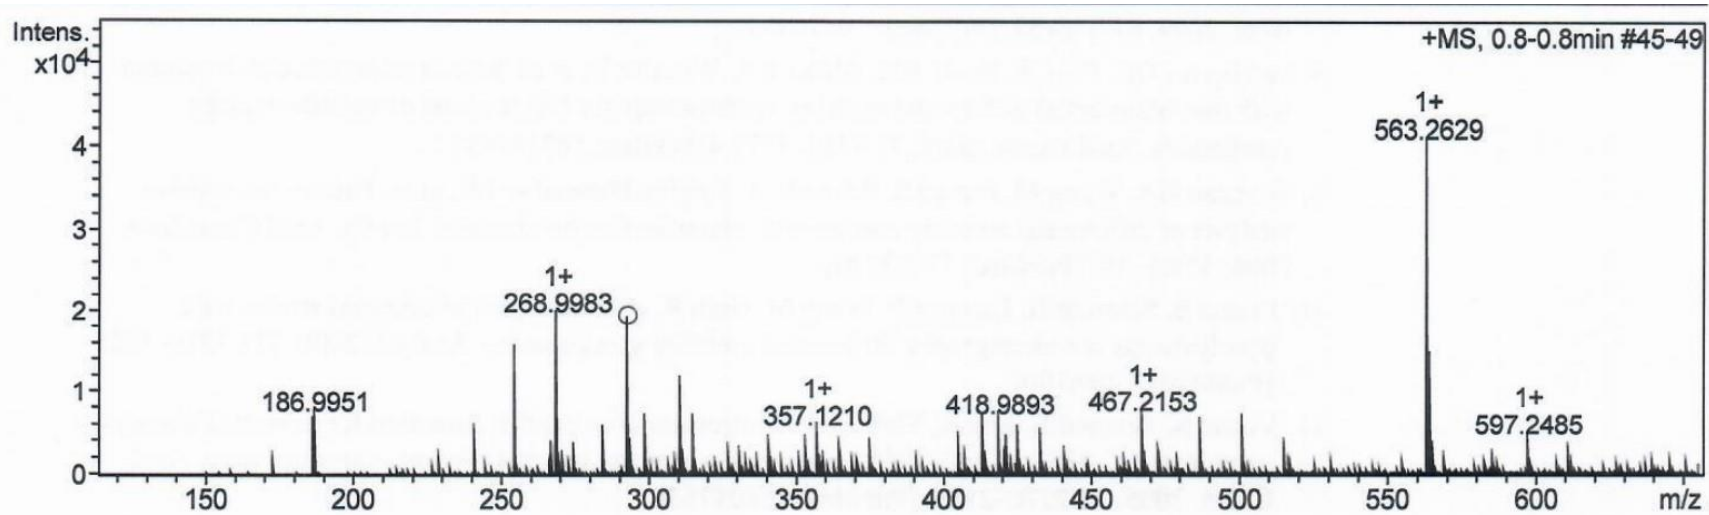

**Figure S15.** HRMS of the (3Z,6Z)-3-Benzylidene-6-(2-methylpropylidene)-4-methyl-2,5-diketopiperazine (**13a**).



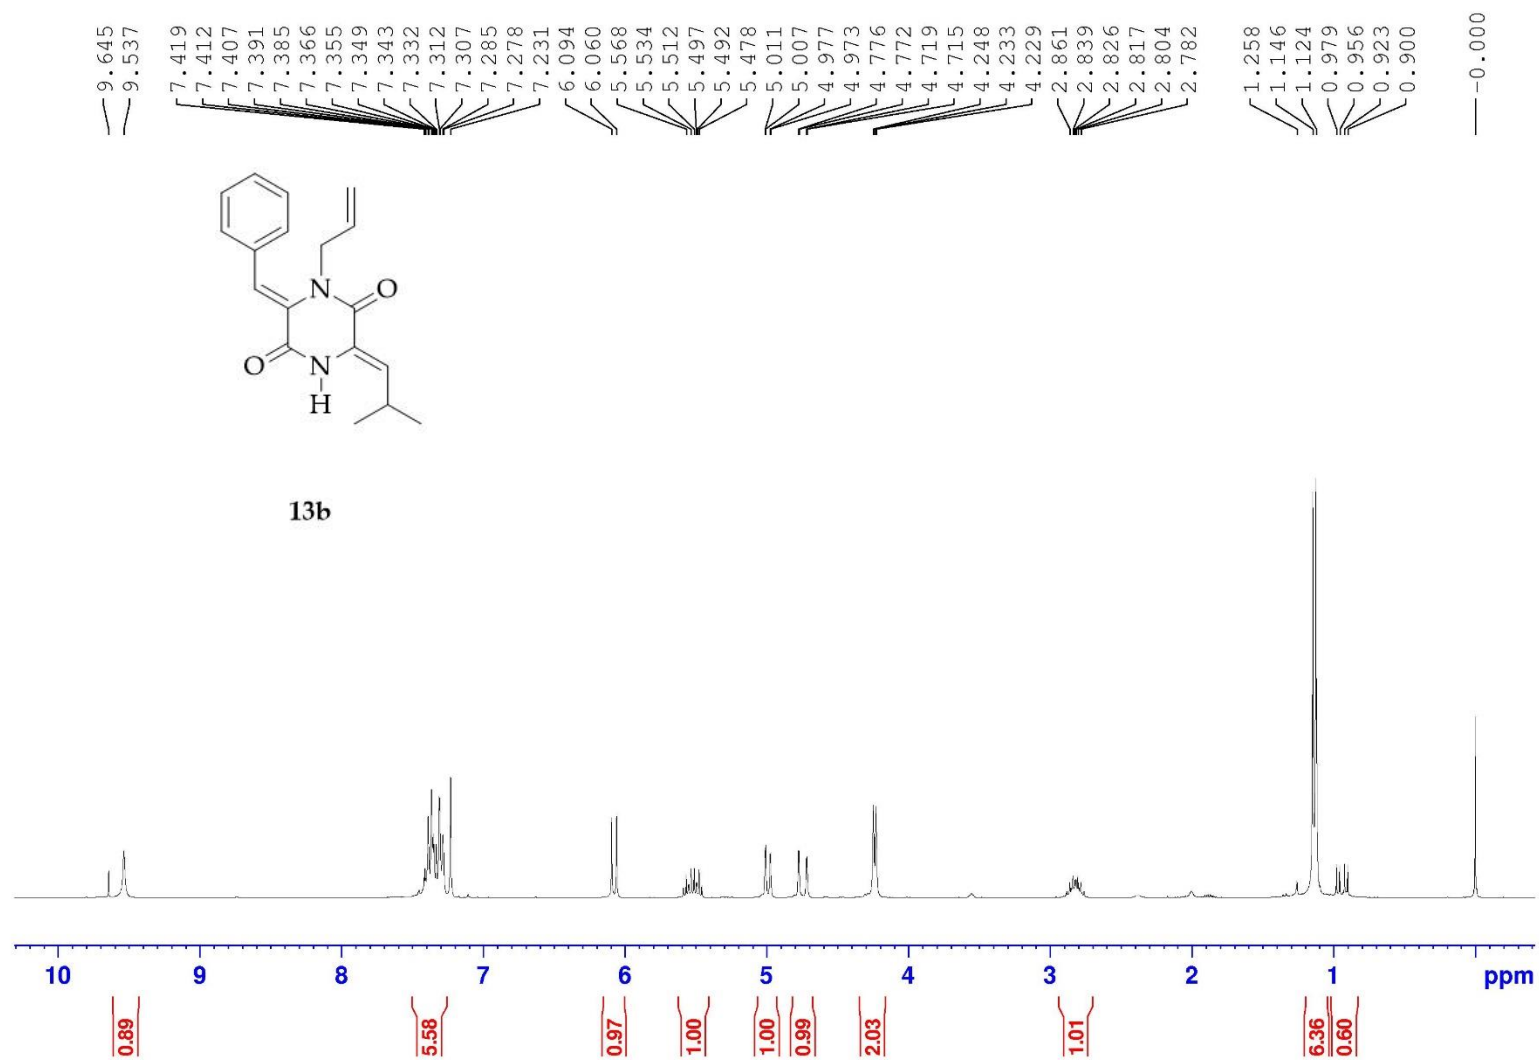

**Figure S16.** <sup>1</sup>H-NMR of the (3Z,6Z)-4-Allyl-3-benzylidene-6-(2-methylpropylidene)-2,5-diketopiperazine (**13b**).

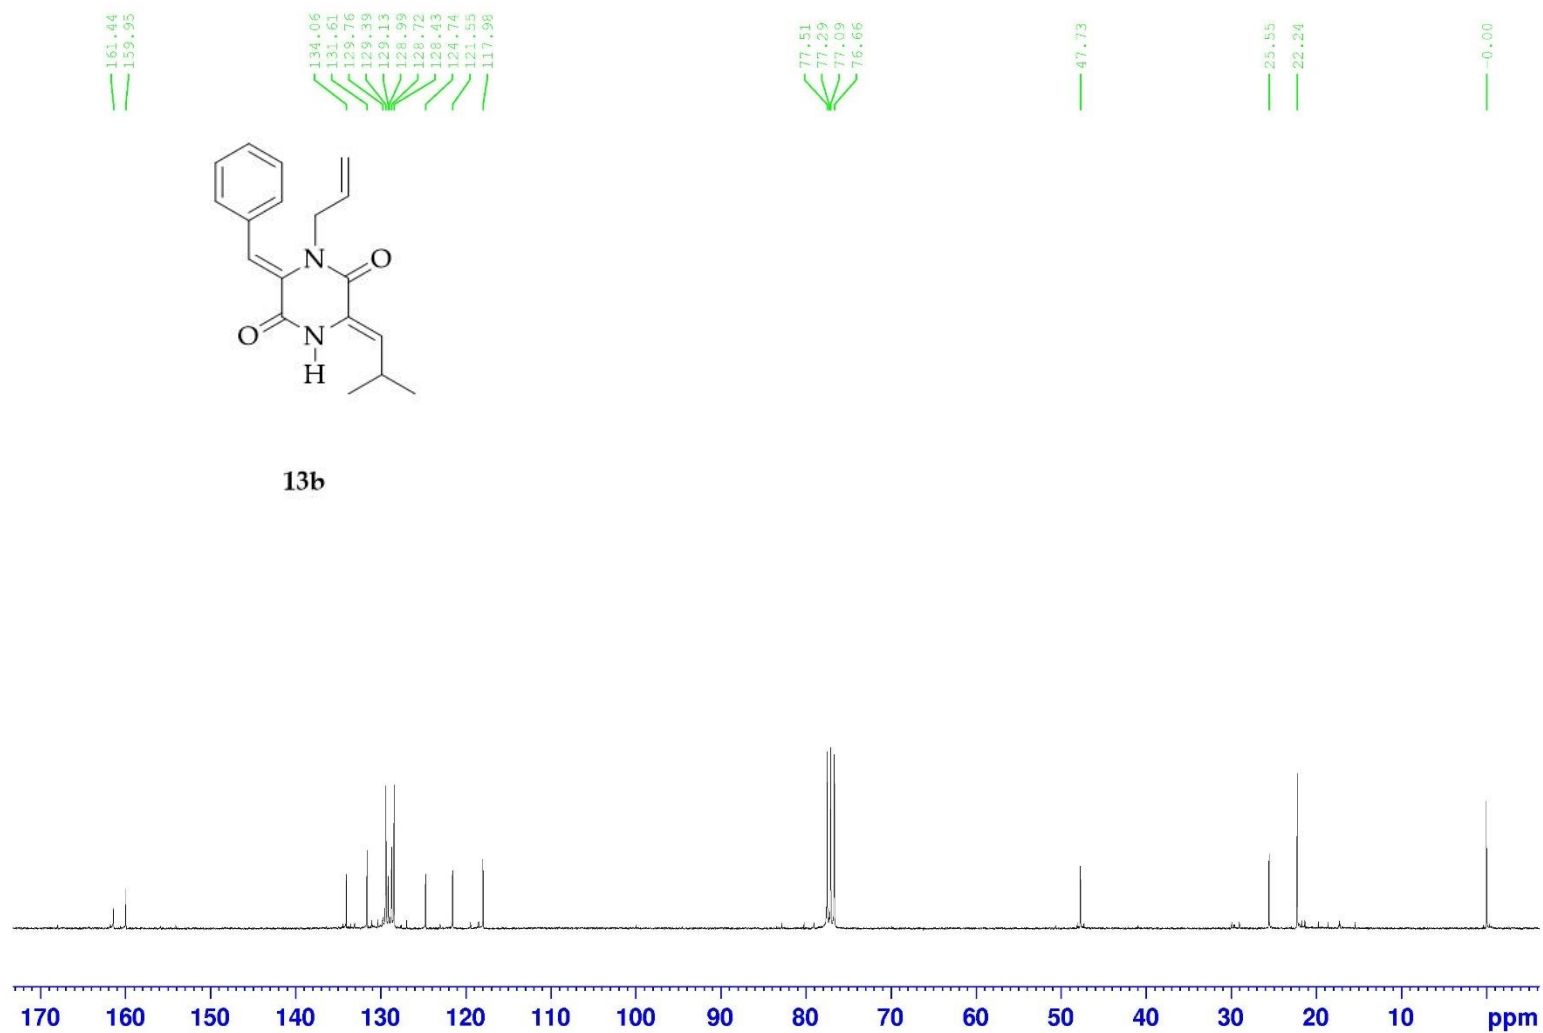

**Figure S17.** <sup>13</sup>C-NMR of the (3Z,6Z)-4-Allyl-3-benzylidene-6-(2-methylpropylidene)-2,5-diketopiperazine (13b).

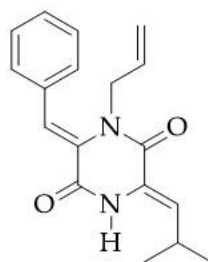

13b

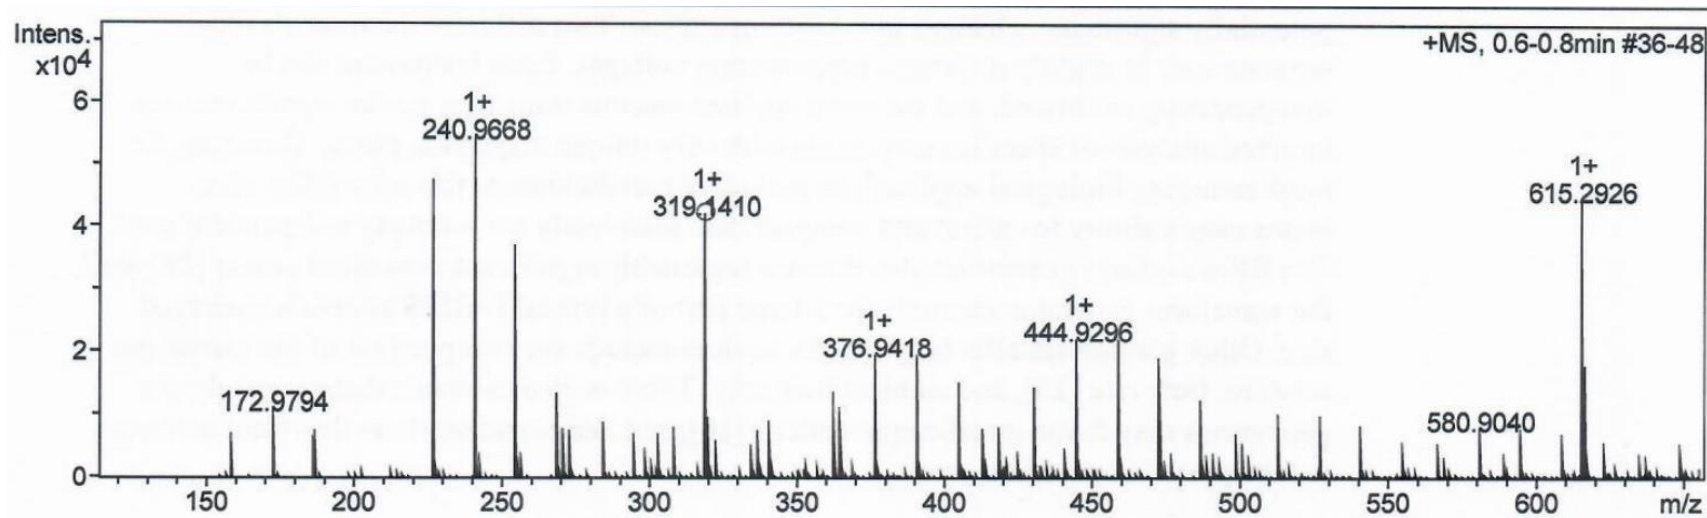

Figure S18. HRMS of the (3Z,6Z)-4-Allyl-3-benzylidene-6-(2-methylpropylidene)-2,5-diketopiperazine (13b).

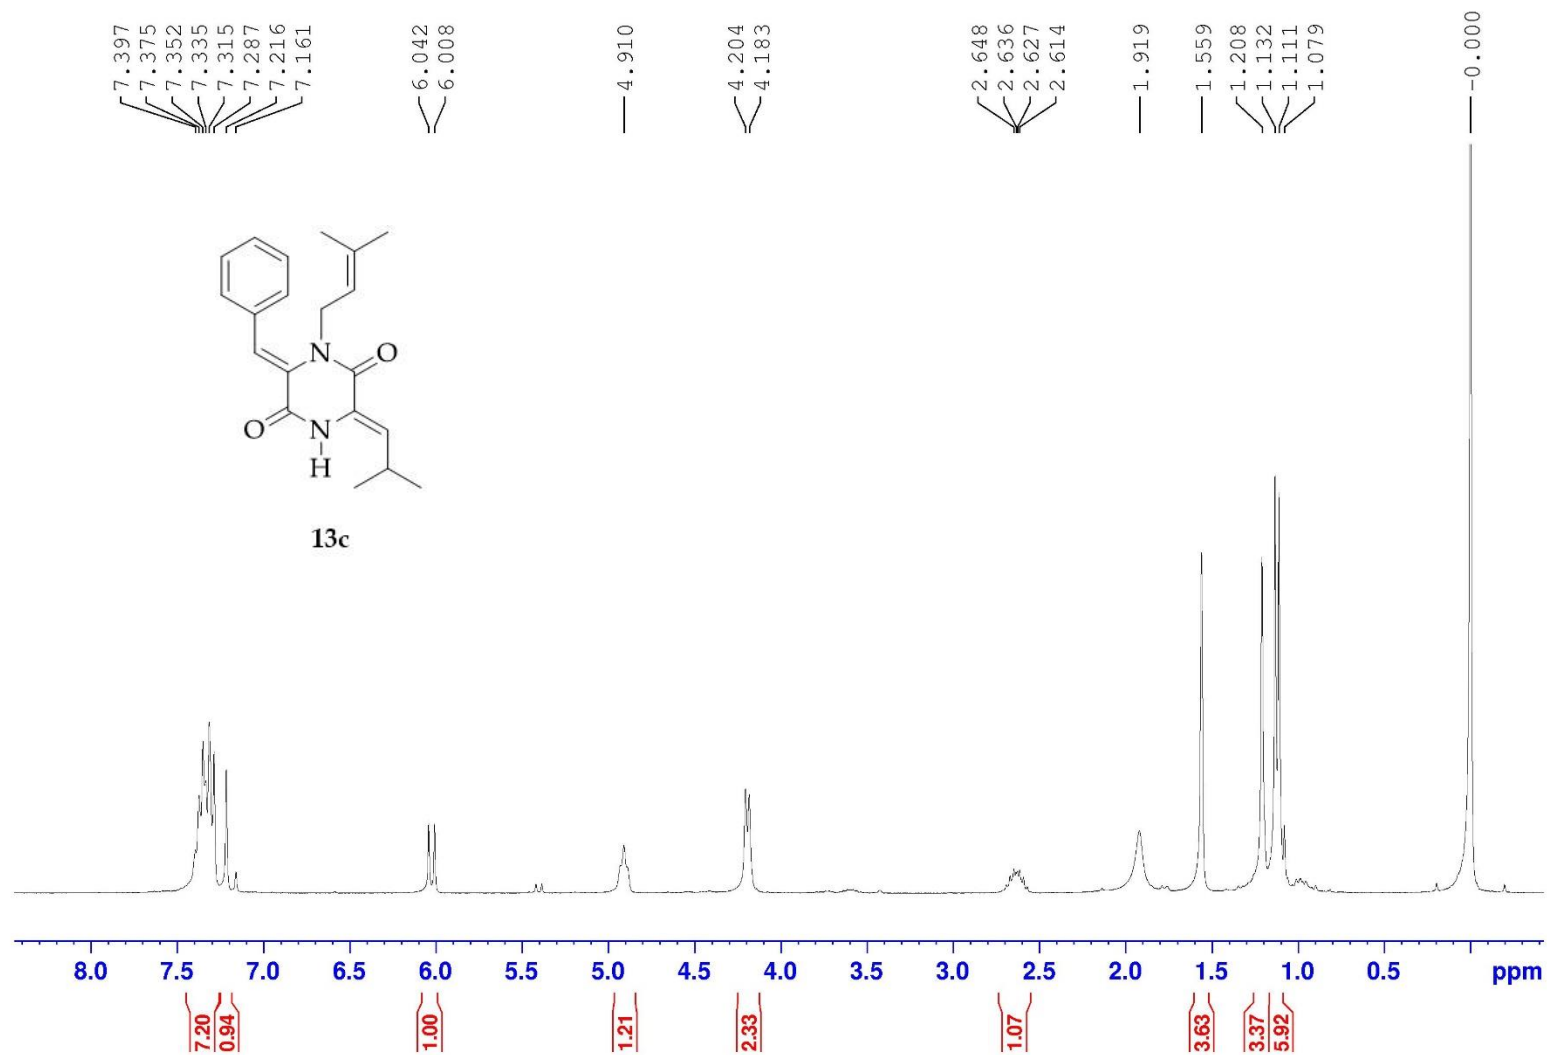

**Figure S19.** <sup>1</sup>H-NMR of the (3Z,6Z)-3-Benzylidene-6-(2-methylpropylidene)-4-(3-methyl but-2-en-1-yl)-2,5-diketopiperazine (**13c**).

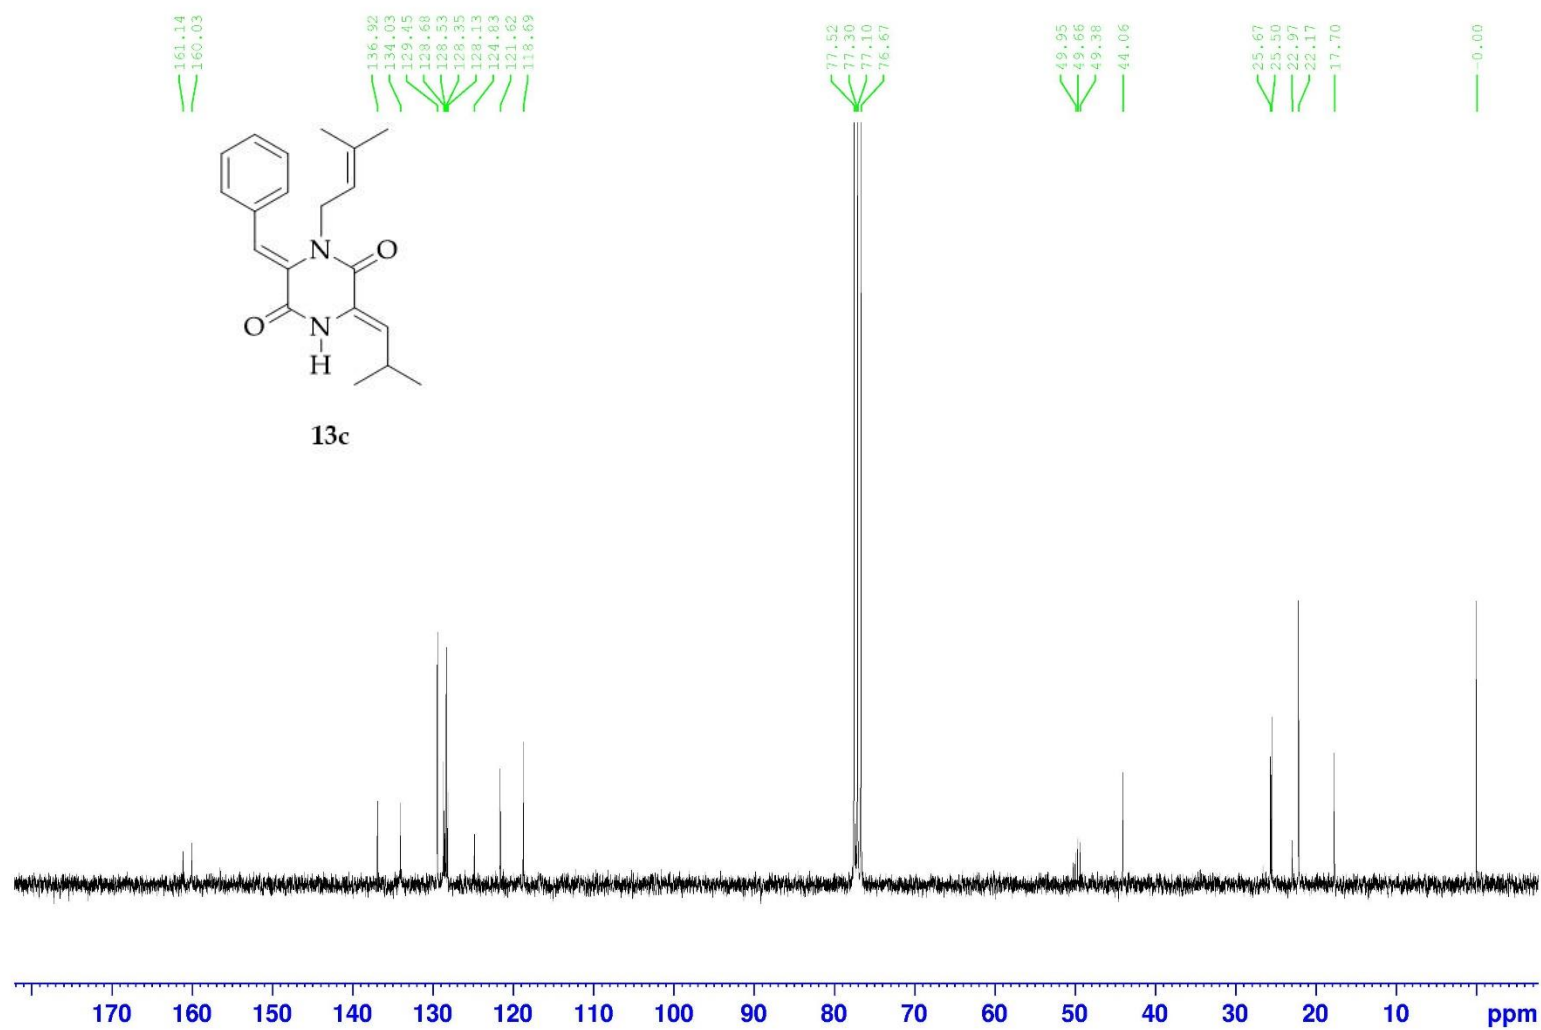

**Figure S20.** <sup>13</sup>C-NMR of the (3Z,6Z)-3-Benzylidene-6-(2-methylpropylidene)-4-(3-methyl but-2-en-1-yl)-2,5-diketopiperazine (13c).

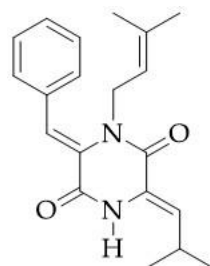

13c

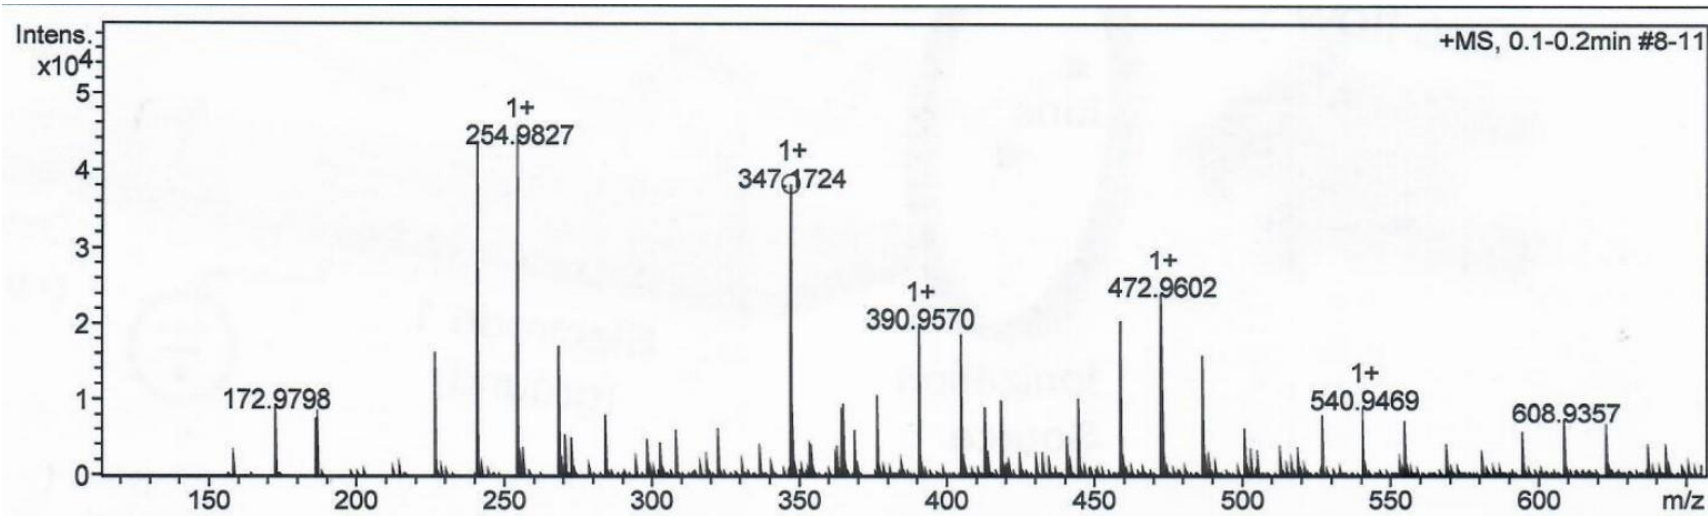

**Figure S21.** HRMS of the (3Z,6Z)-3-Benzylidene-6-(2-methylpropylidene)-4-(3-methyl but-2-en-1-yl)-2,5-diketopiperazine (**13c**).

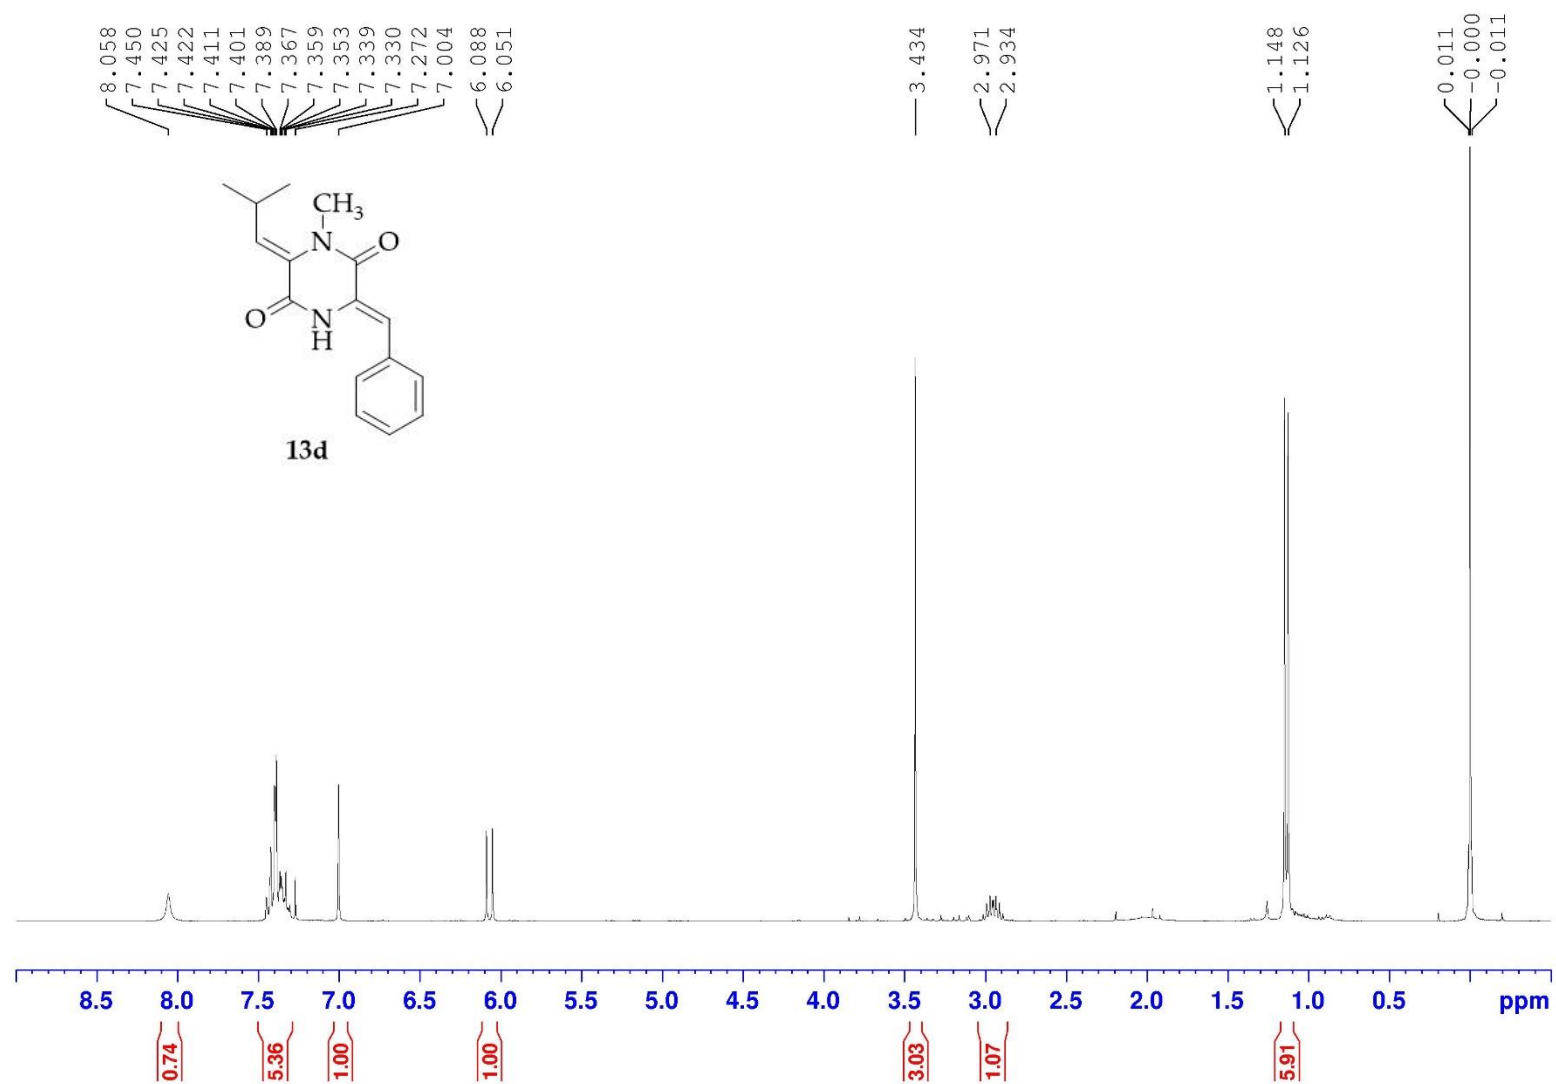

**Figure S22.** <sup>1</sup>H-NMR of the (3*Z*,6*Z*)-3-Benzylidene-6-(2-methylpropylidene)-1-methyl-2,5-diketopiperazine (**13d**).

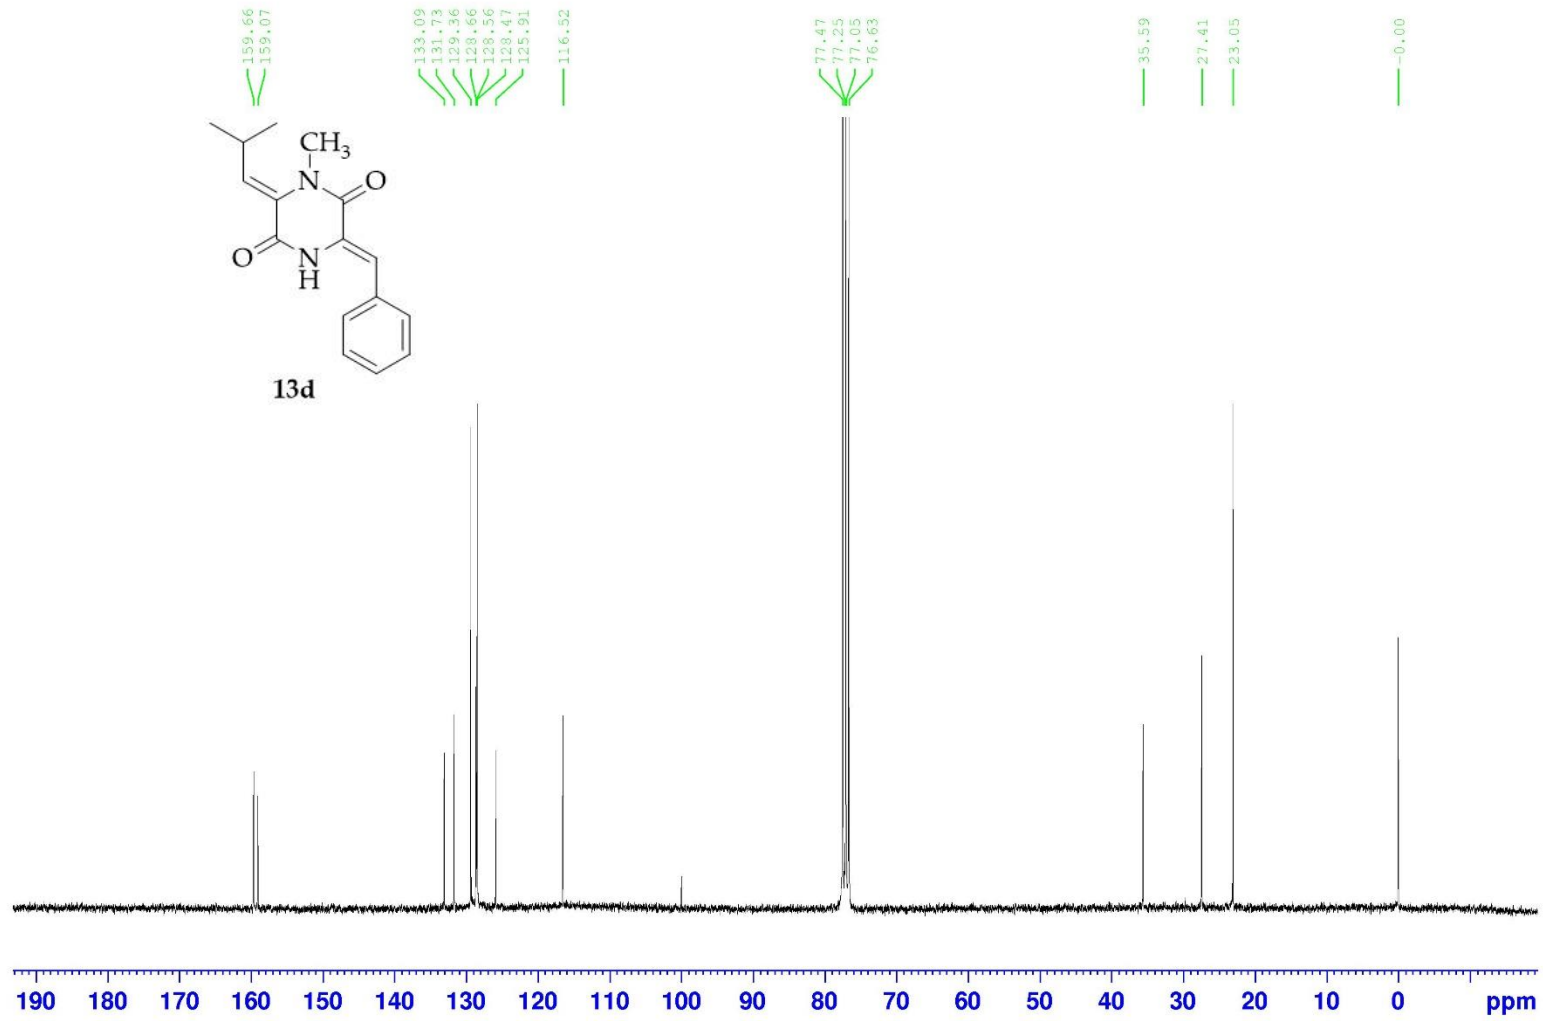

**Figure S23.** <sup>13</sup>C-NMR of the (3*Z*,6*Z*)-3-Benzylidene-6-(2-methylpropylidene)-1-methyl-2,5-diketopiperazine (**13d**).



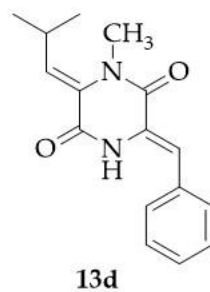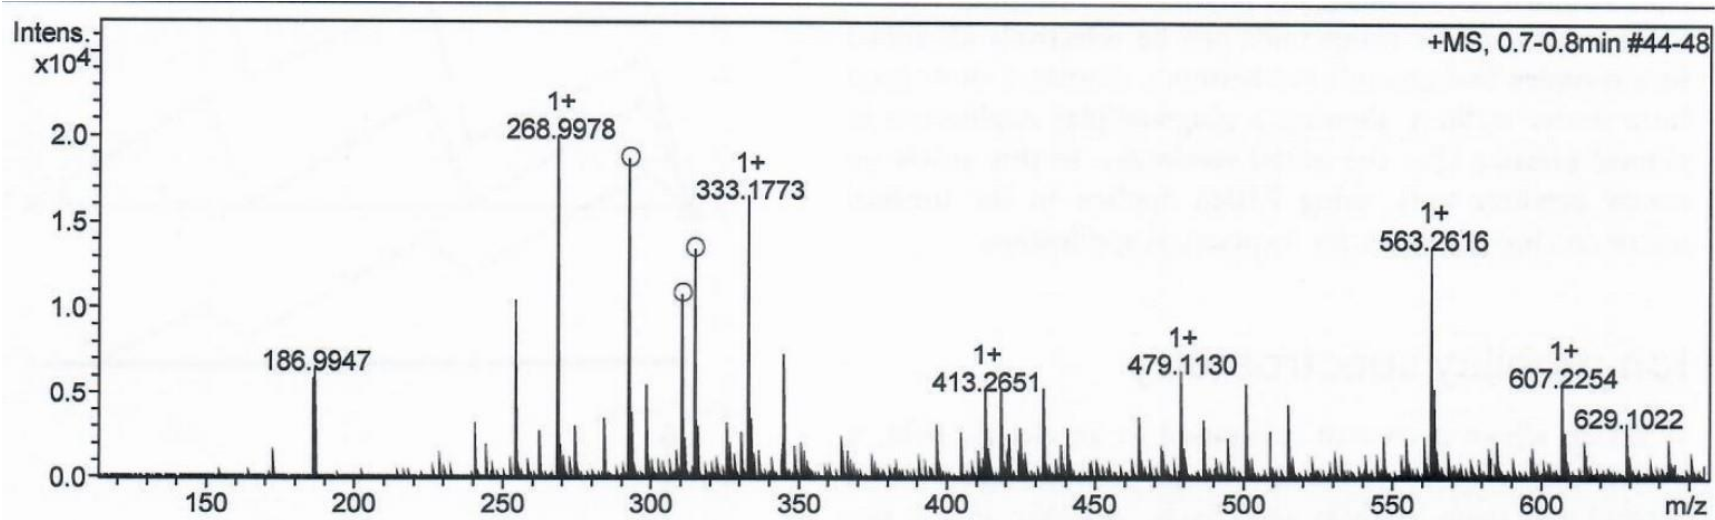

**Figure S24.** HRMS of the (3Z,6Z)-3-Benzylidene-6-(2-methylpropylidene)-1-methyl-2,5-diketopiperazine (**13d**).

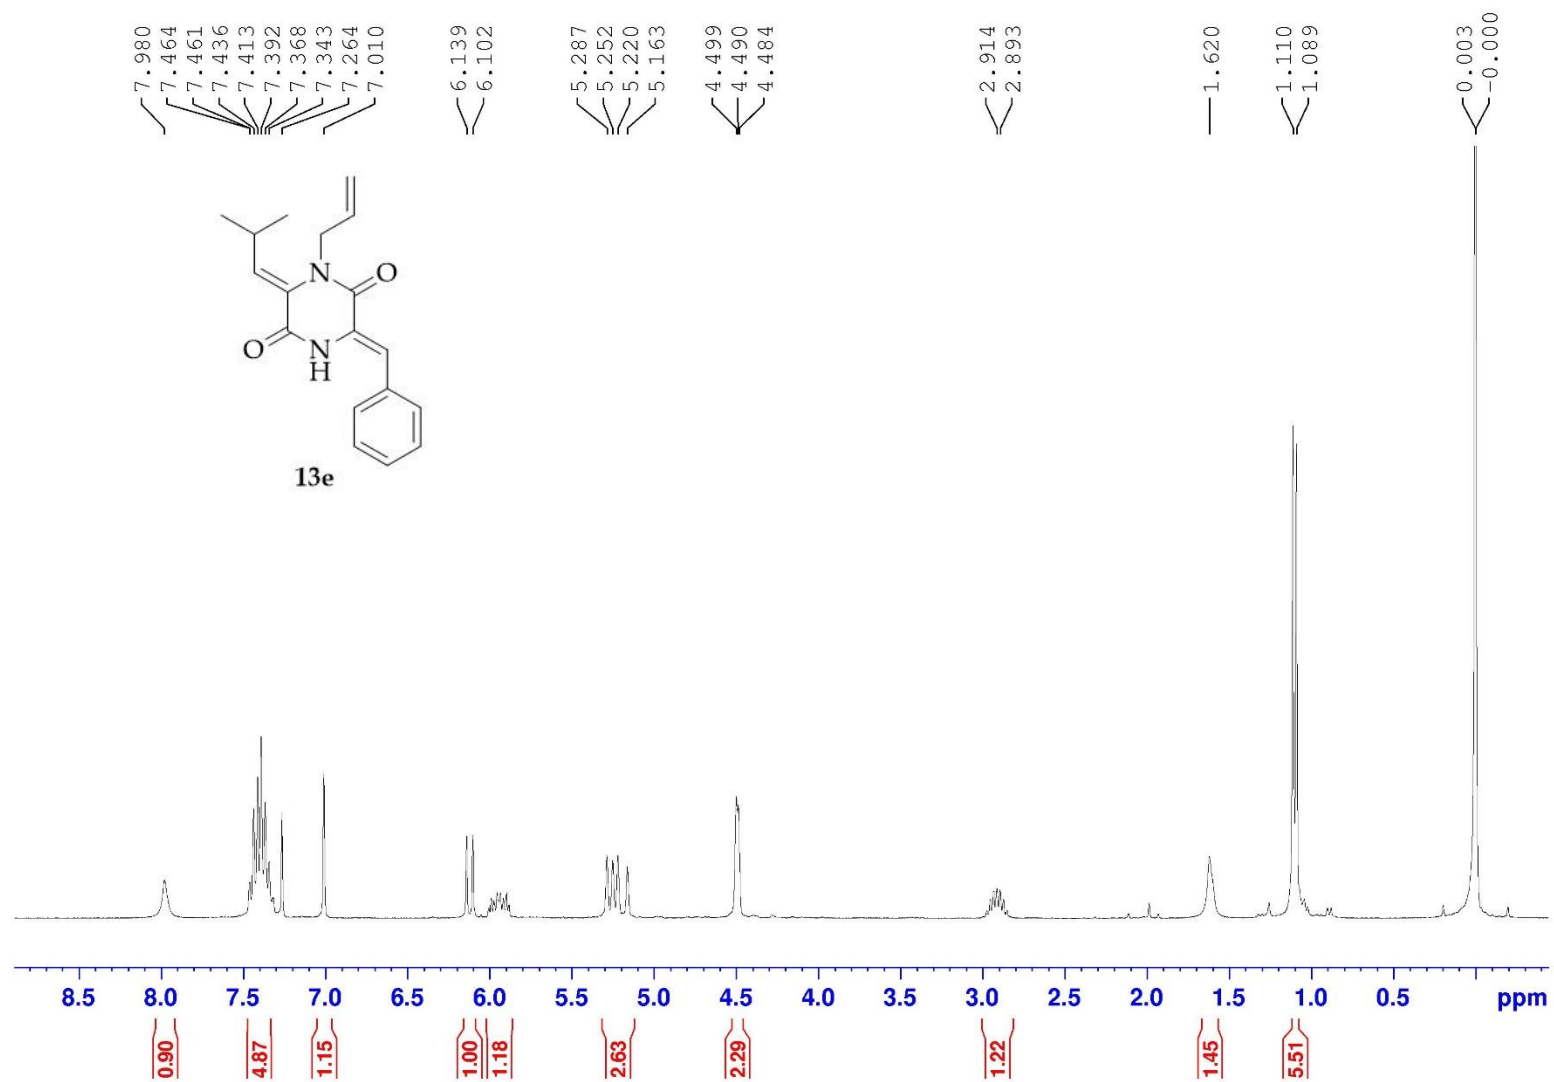

**Figure S25.**  $^1\text{H}$ -NMR of the (3Z,6Z)-1-Allyl-3-benzylidene-6-(2-methylpropylidene)-2,5-diketopiperazine (**13e**).

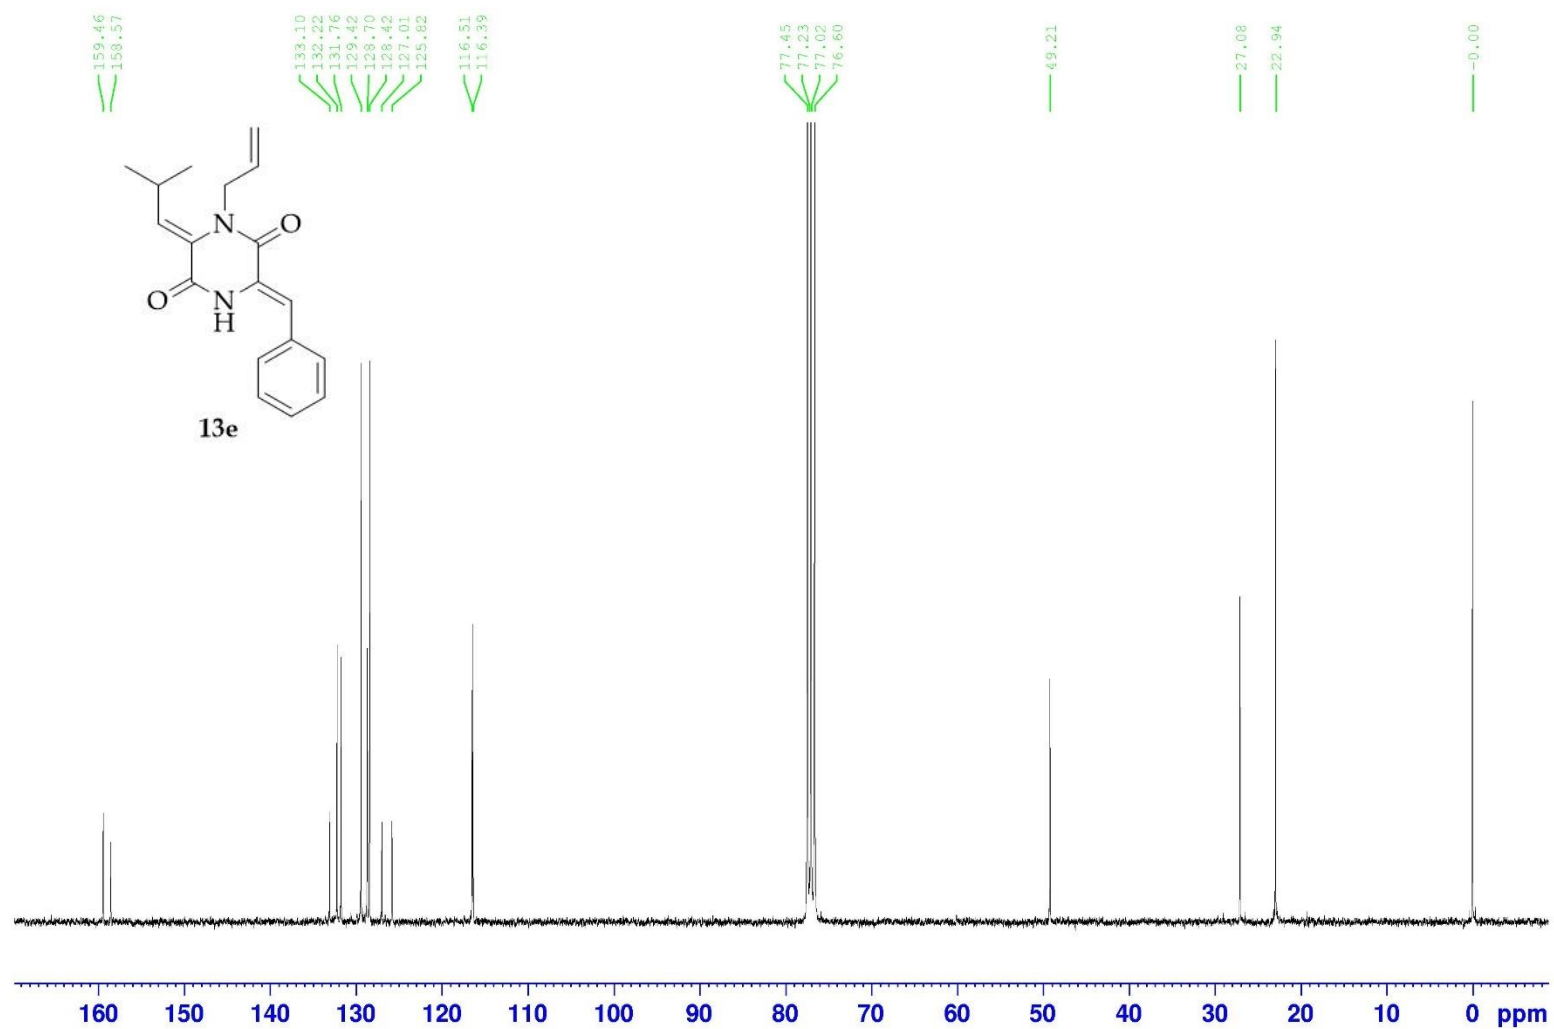

**Figure S26.** <sup>13</sup>C-NMR of the (3Z,6Z)-1-Allyl-3-benzylidene-6-(2-methylpropylidene)-2,5-diketopiperazine (**13e**).

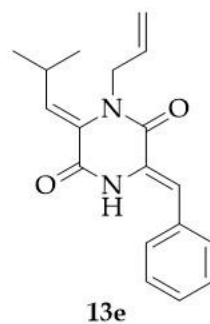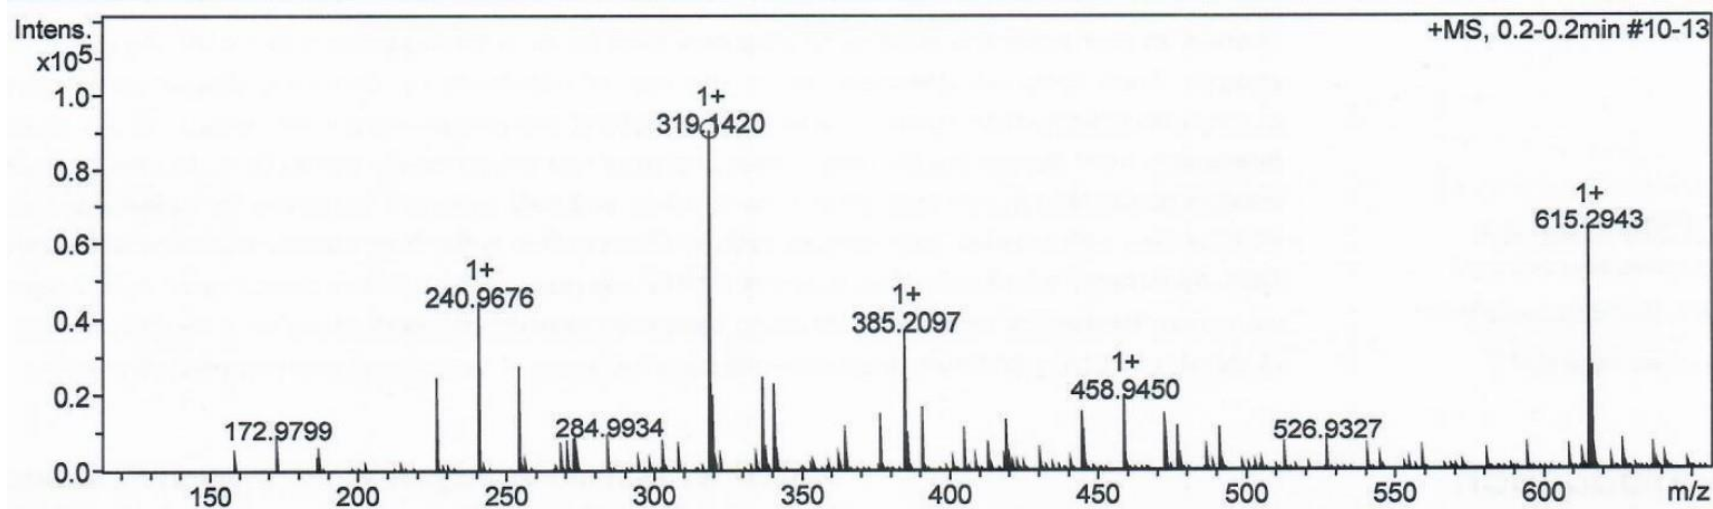

**Figure S27.** HRMS of the (3Z,6Z)-1-Allyl-3-benzylidene-6-(2-methylpropylidene)-2,5-diketopiperazine (**13e**).

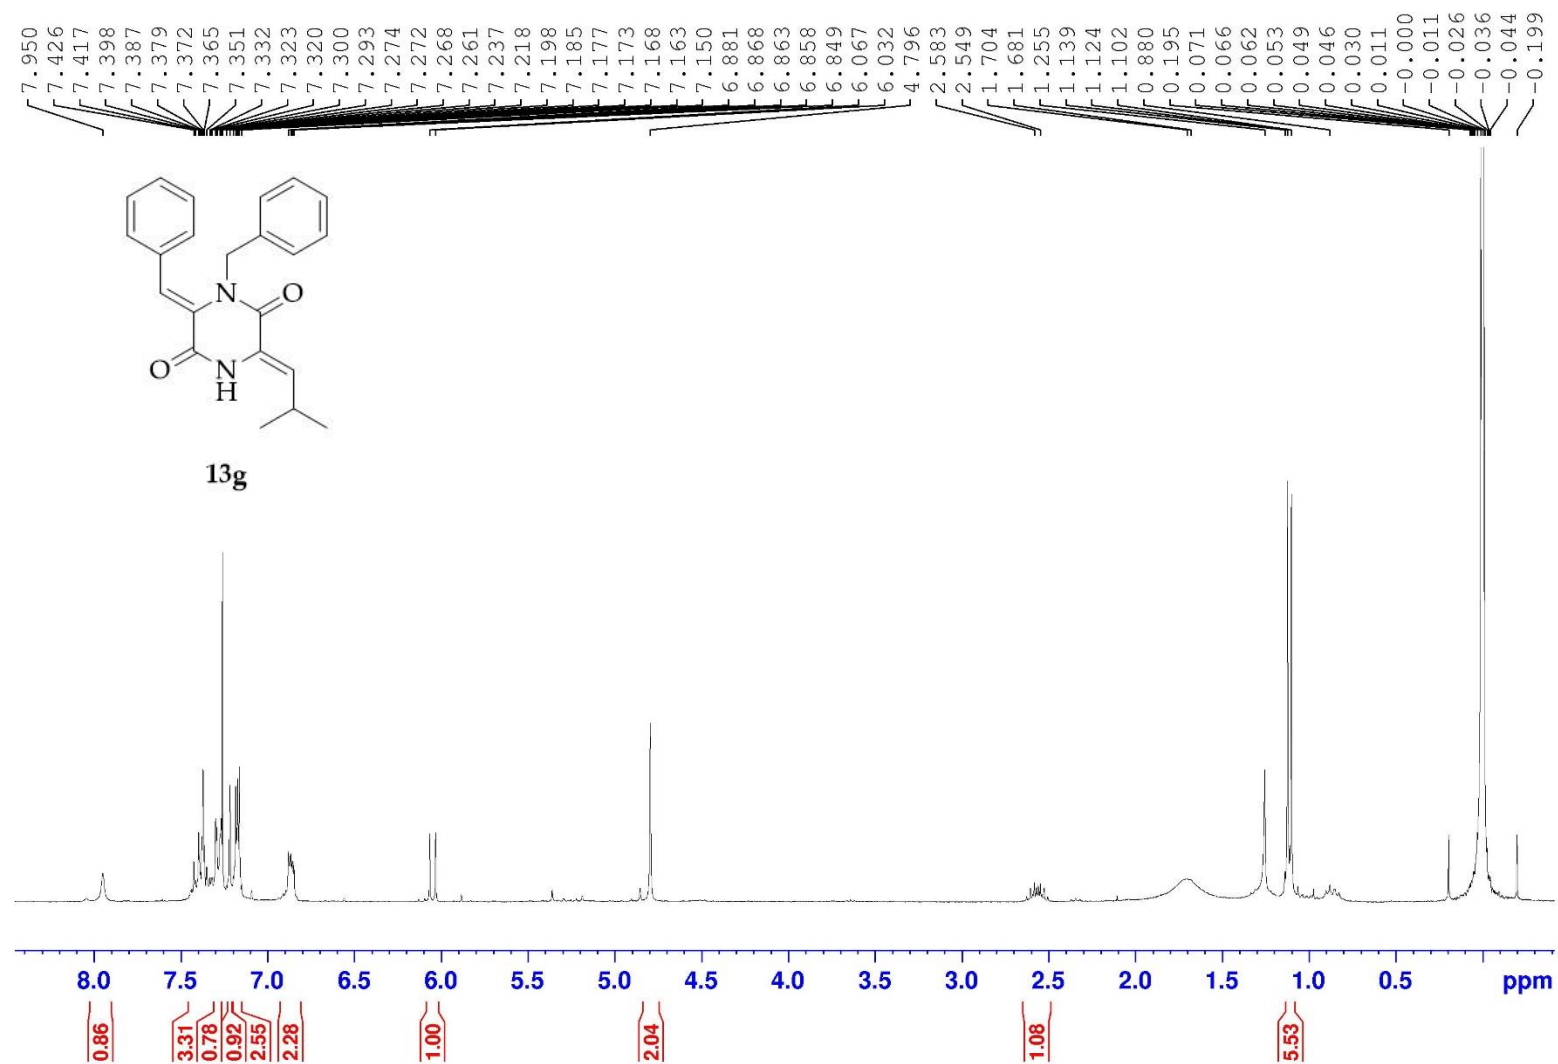

**Figure S28.** <sup>1</sup>H-NMR of the (3*Z*,6*Z*)-4-Benzyl-3-benzylidene-6-(2-methylpropylidene)-2,5-diketopiperazine (**13g**).

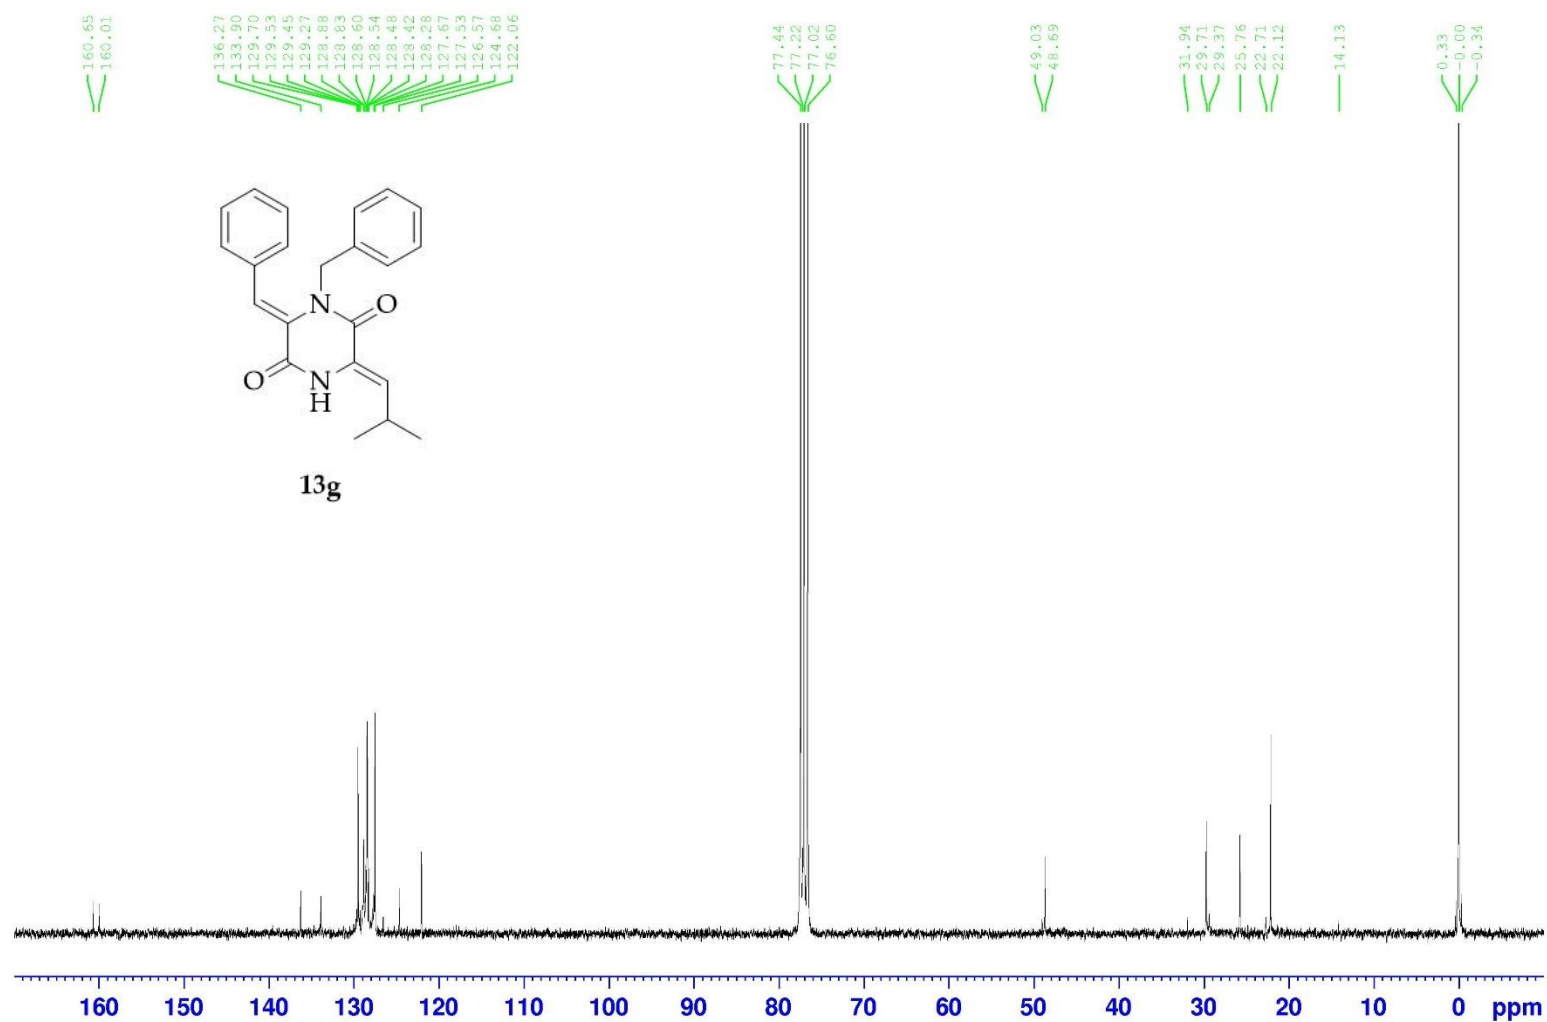

**Figure S29.** <sup>13</sup>C-NMR of the (3*Z*,6*Z*)-4-Benzyl-3-benzylidene-6-(2-methylpropylidene)-2,5-diketopiperazine (**13g**).

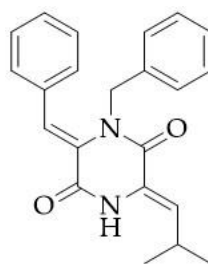

13g

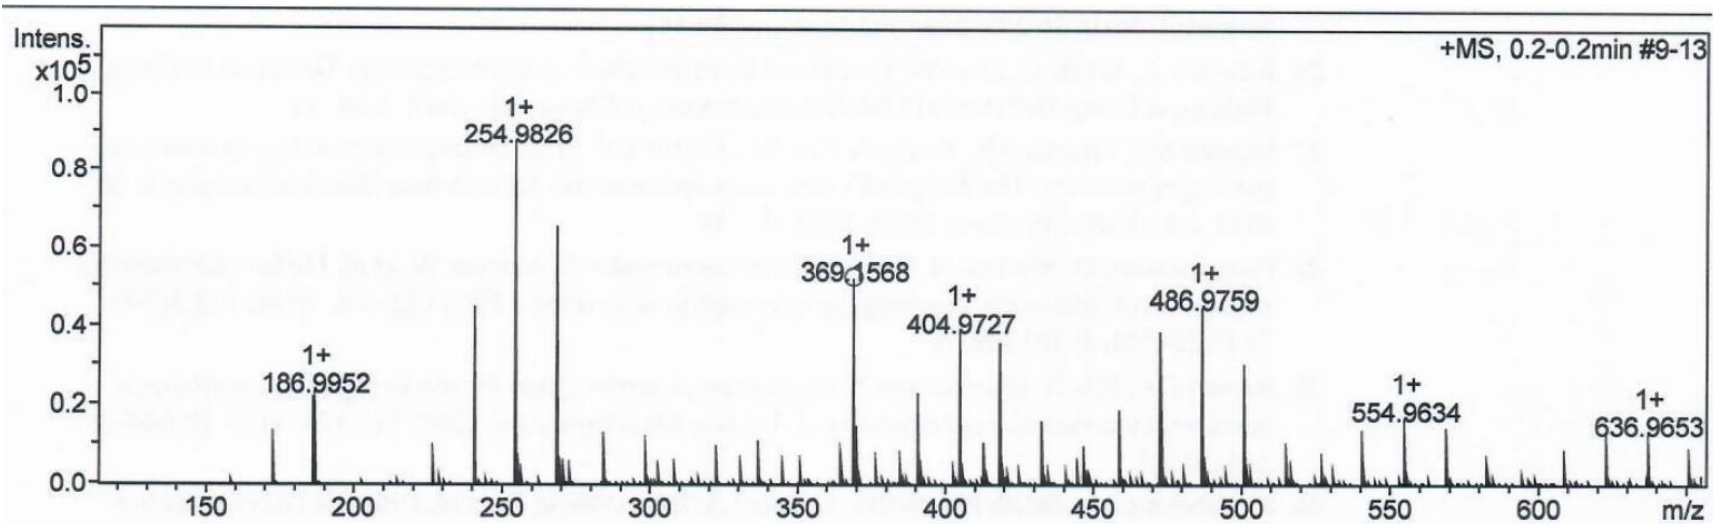

Figure S30. HRMS of the (3Z,6Z)-4-Benzyl-3-benzylidene-6-(2-methylpropylidene)-2,5-diketopiperazine (13g).

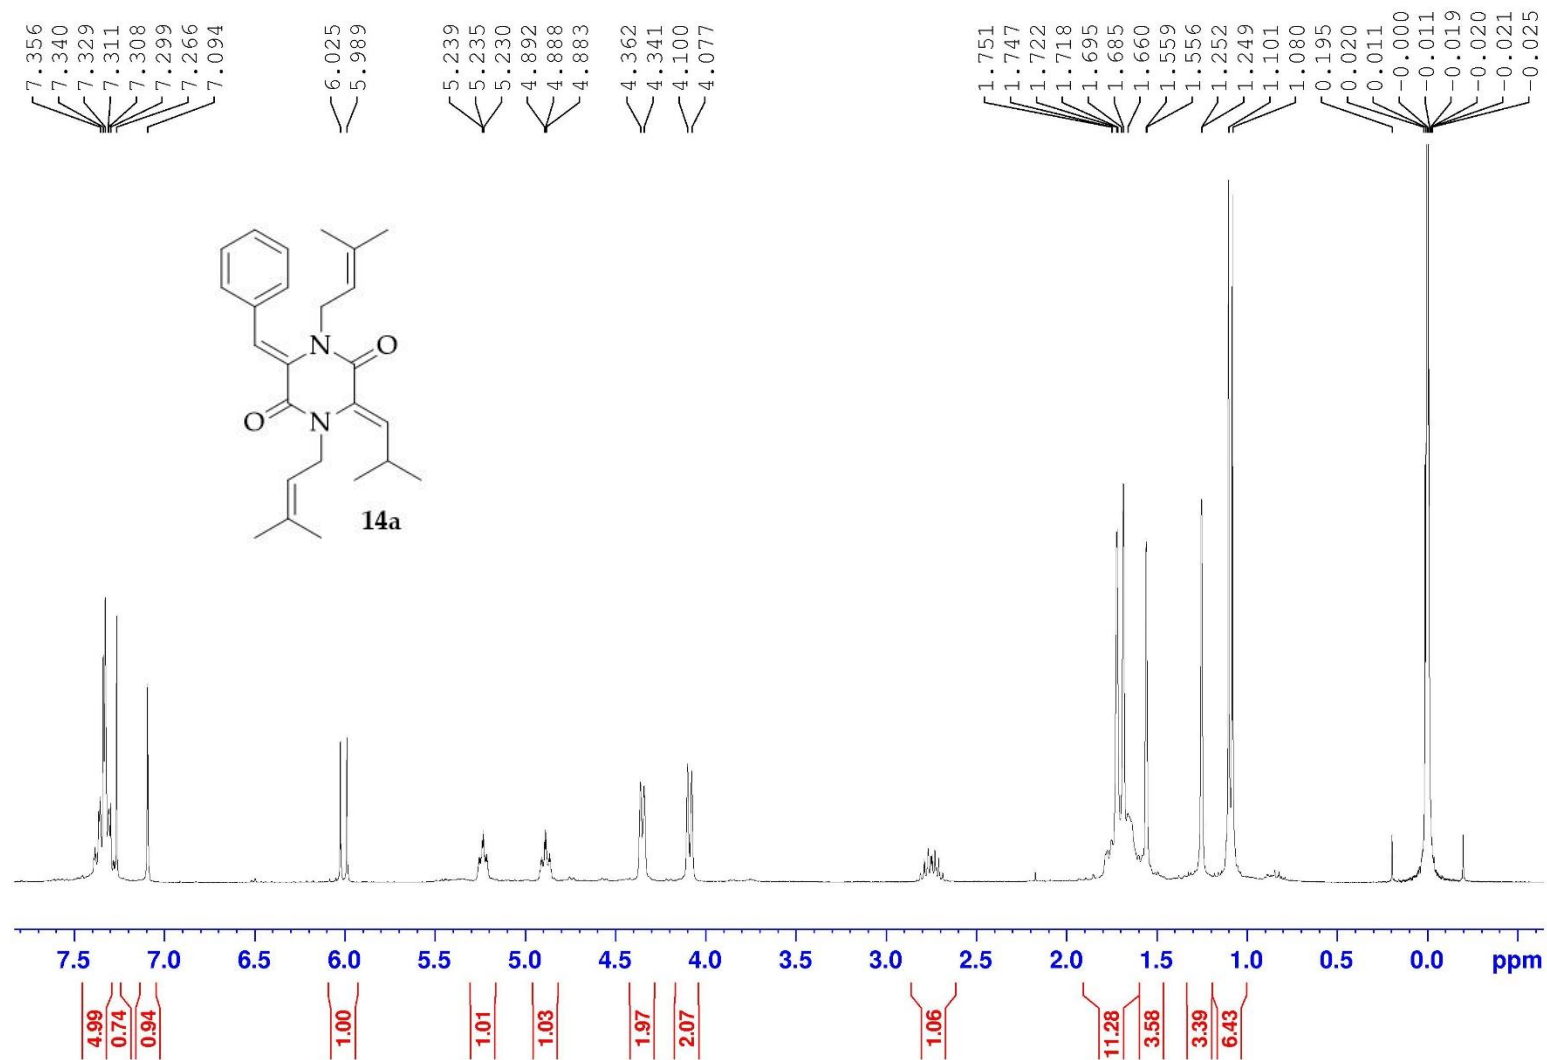

**Figure S31.** <sup>1</sup>H-NMR of the (3Z,6Z)-3-Benzylidene-6-(2-methylpropylidene)-1,4-bis(-3-methylbut-2-en-1-yl)-2,5-diketopiperazine (**14a**).



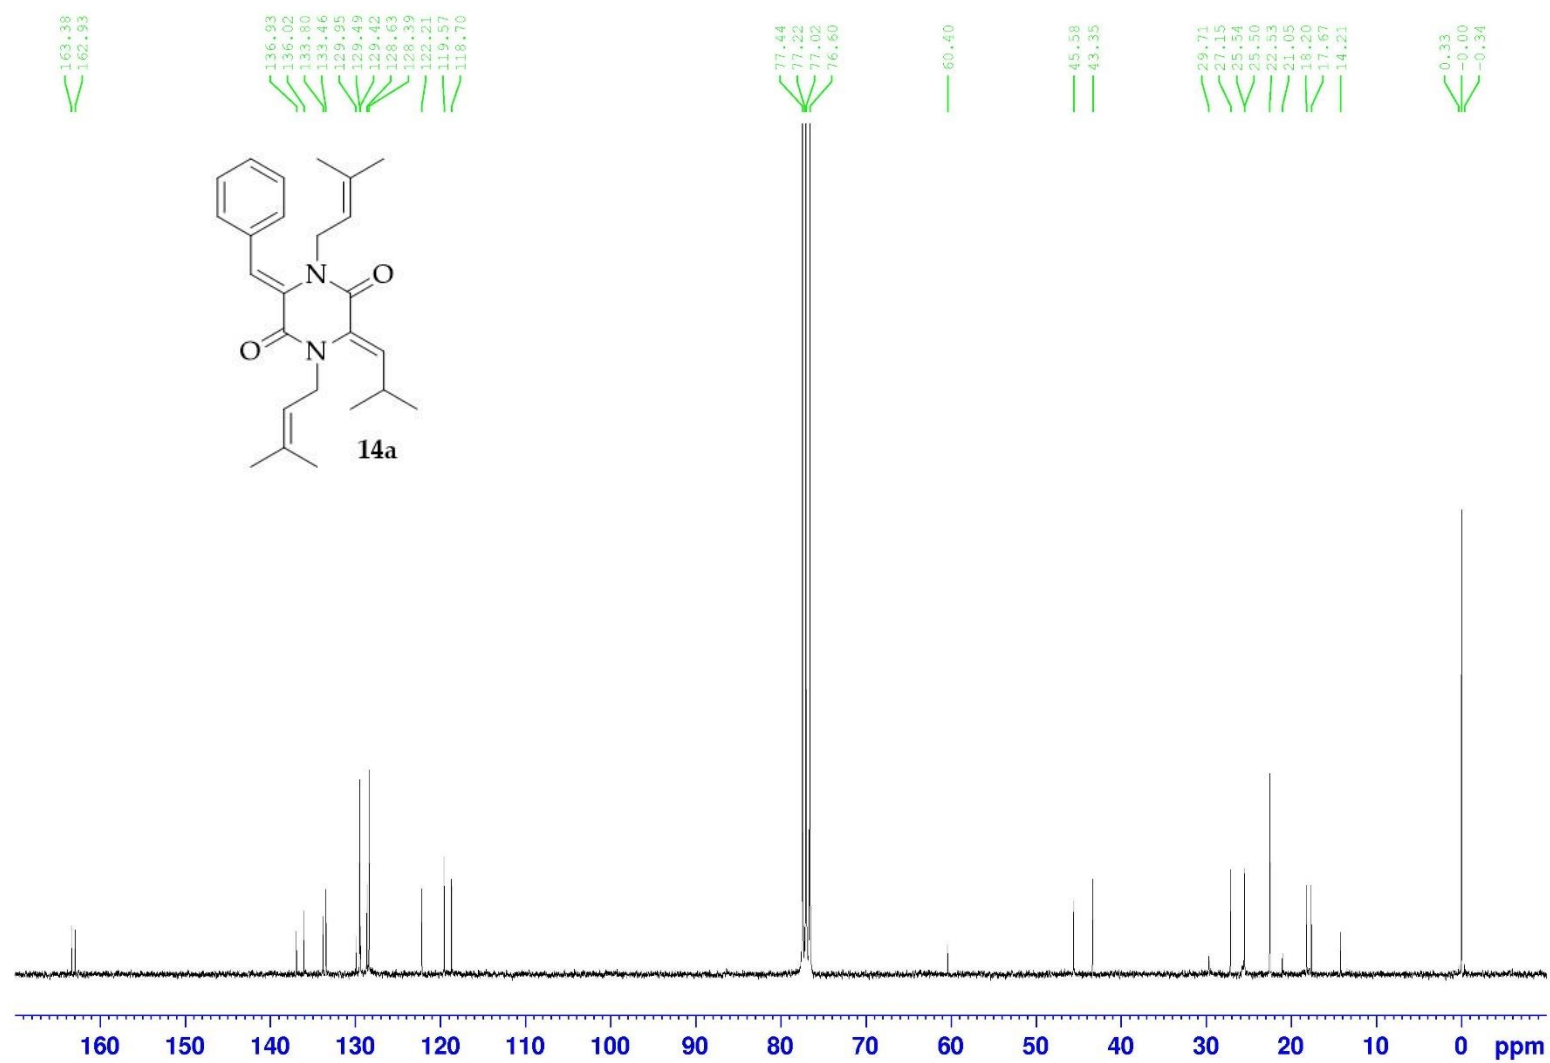

**Figure S32.**  $^{13}\text{C}$ -NMR of the (3*Z*,6*Z*)-3-Benzylidene-6-(2-methylpropylidene)-1,4-bis(-3-methylbut-2-en-1-yl)-2,5-diketopiperazine (**14a**).

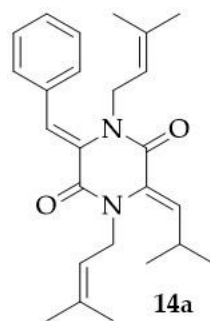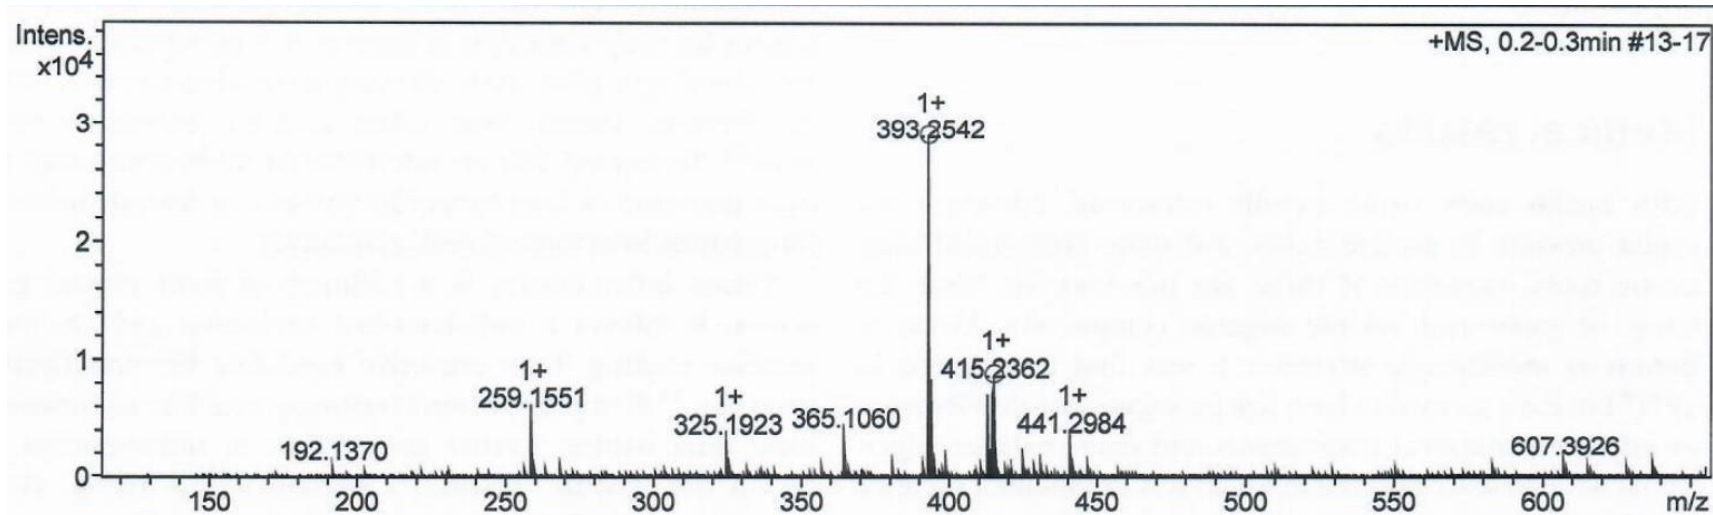

**Figure S33.** HRMS of the (3*Z*,6*Z*)-3-Benzylidene-6-(2-methylpropylidene)-1,4-bis(-3-methylbut-2-en-1-yl)-2,5-diketopiperazine (**14a**).

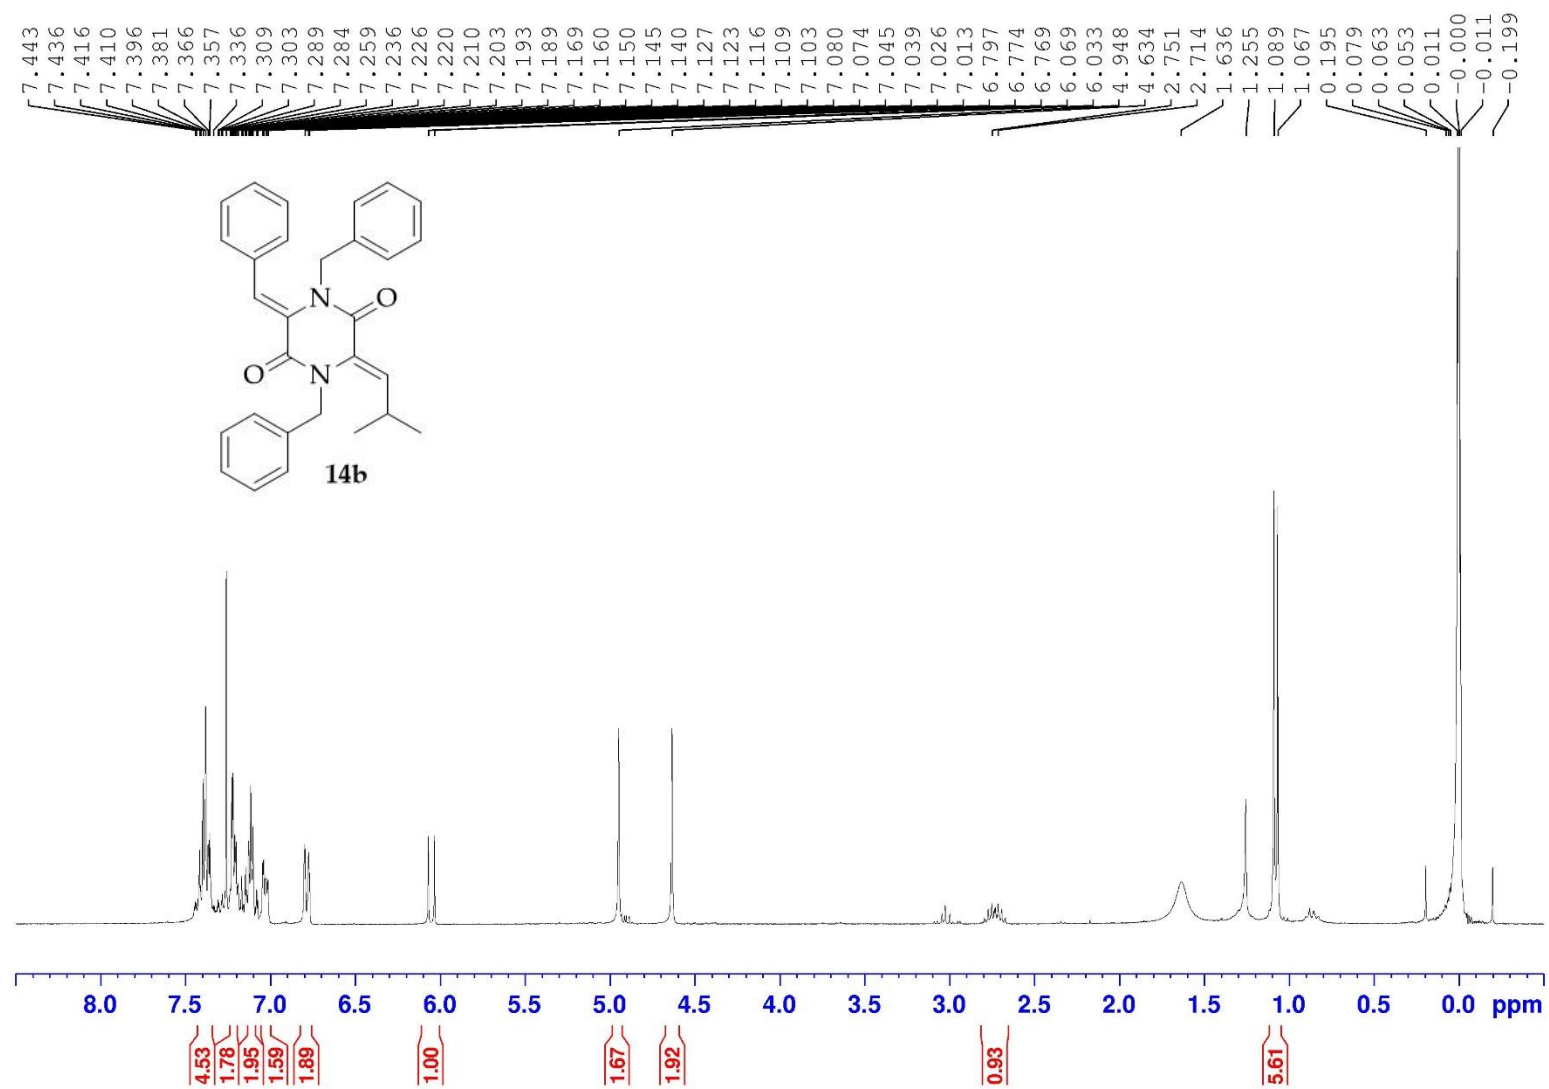

**Figure S34.** <sup>1</sup>H-NMR of the (3Z,6Z)-1,4-Dibenzyl-3-benzylidene-6-(2-methylpropylidene)-2,5-diketo piperazine (**14b**).

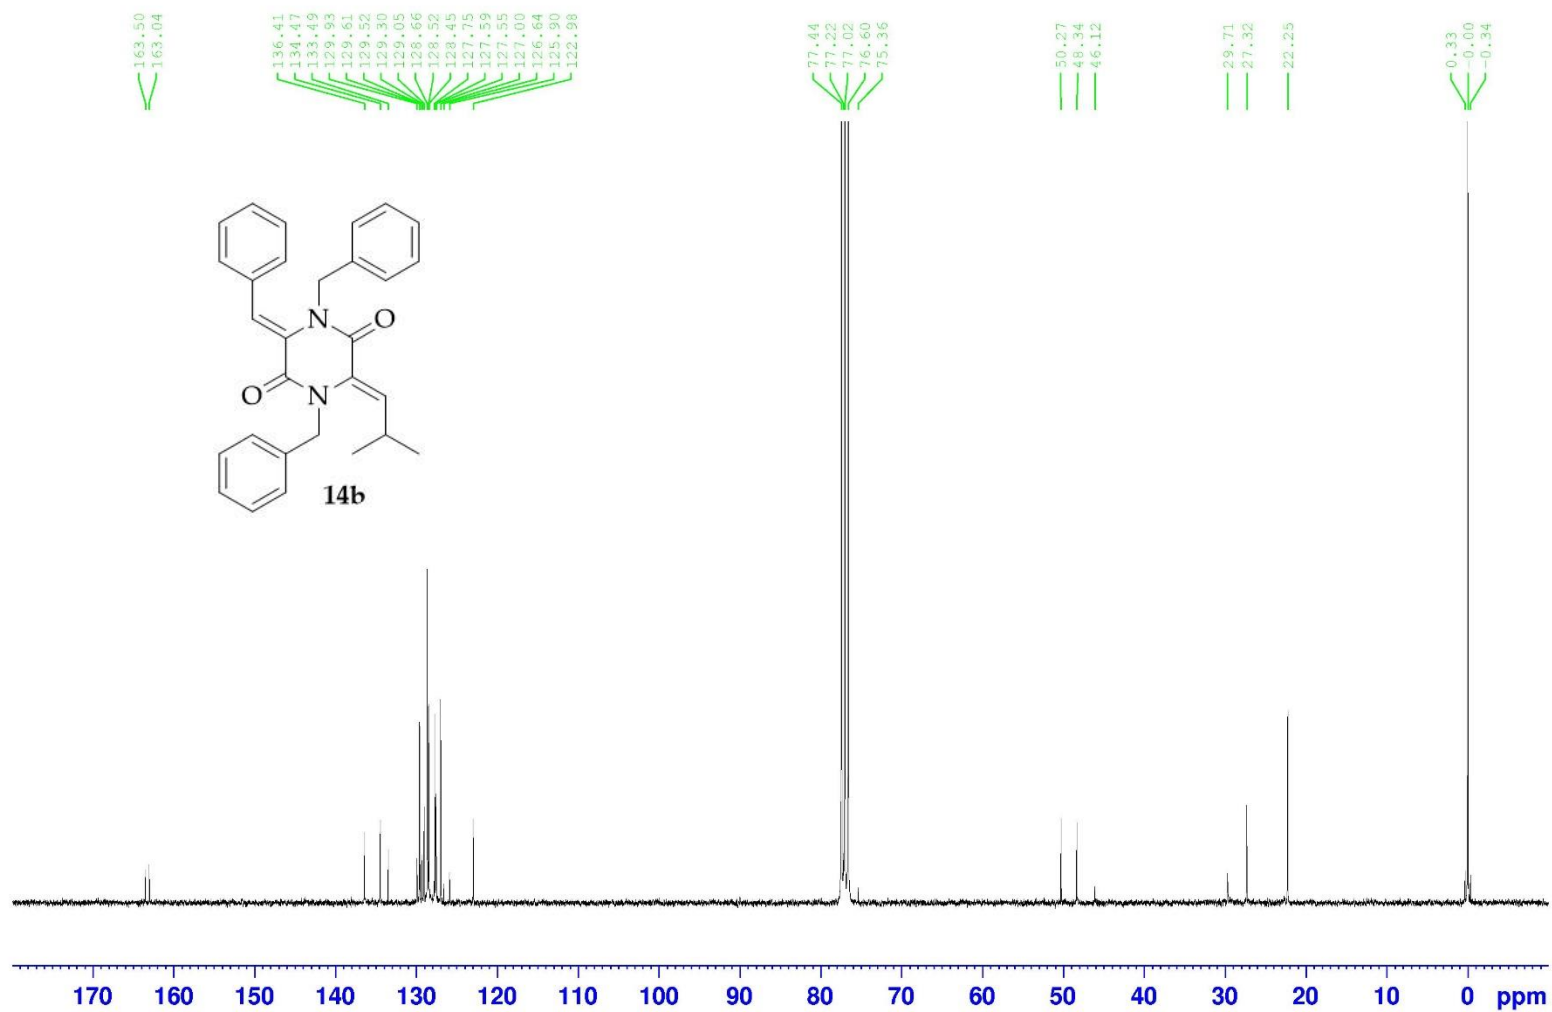

**Figure S35.** <sup>13</sup>C-NMR of the (3Z,6Z)-1,4-Dibenzyl-3-benzylidene-6-(2-methylpropylidene)-2,5-diketo piperazine (**14b**).

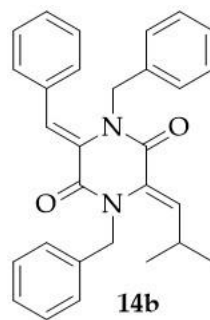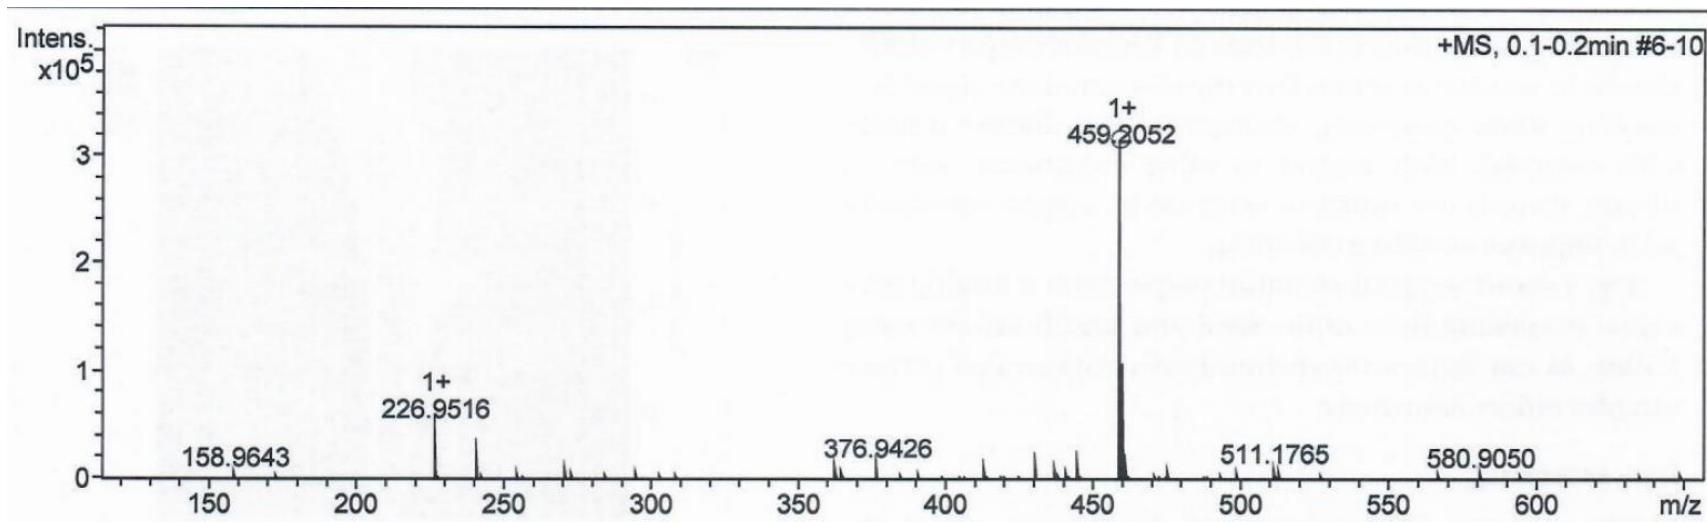

**Figure S36.** HRMS of the (3Z,6Z)-1,4-Dibenzyl-3-benzylidene-6-(2-methylpropylidene)-2,5-diketo piperazine (**14b**).

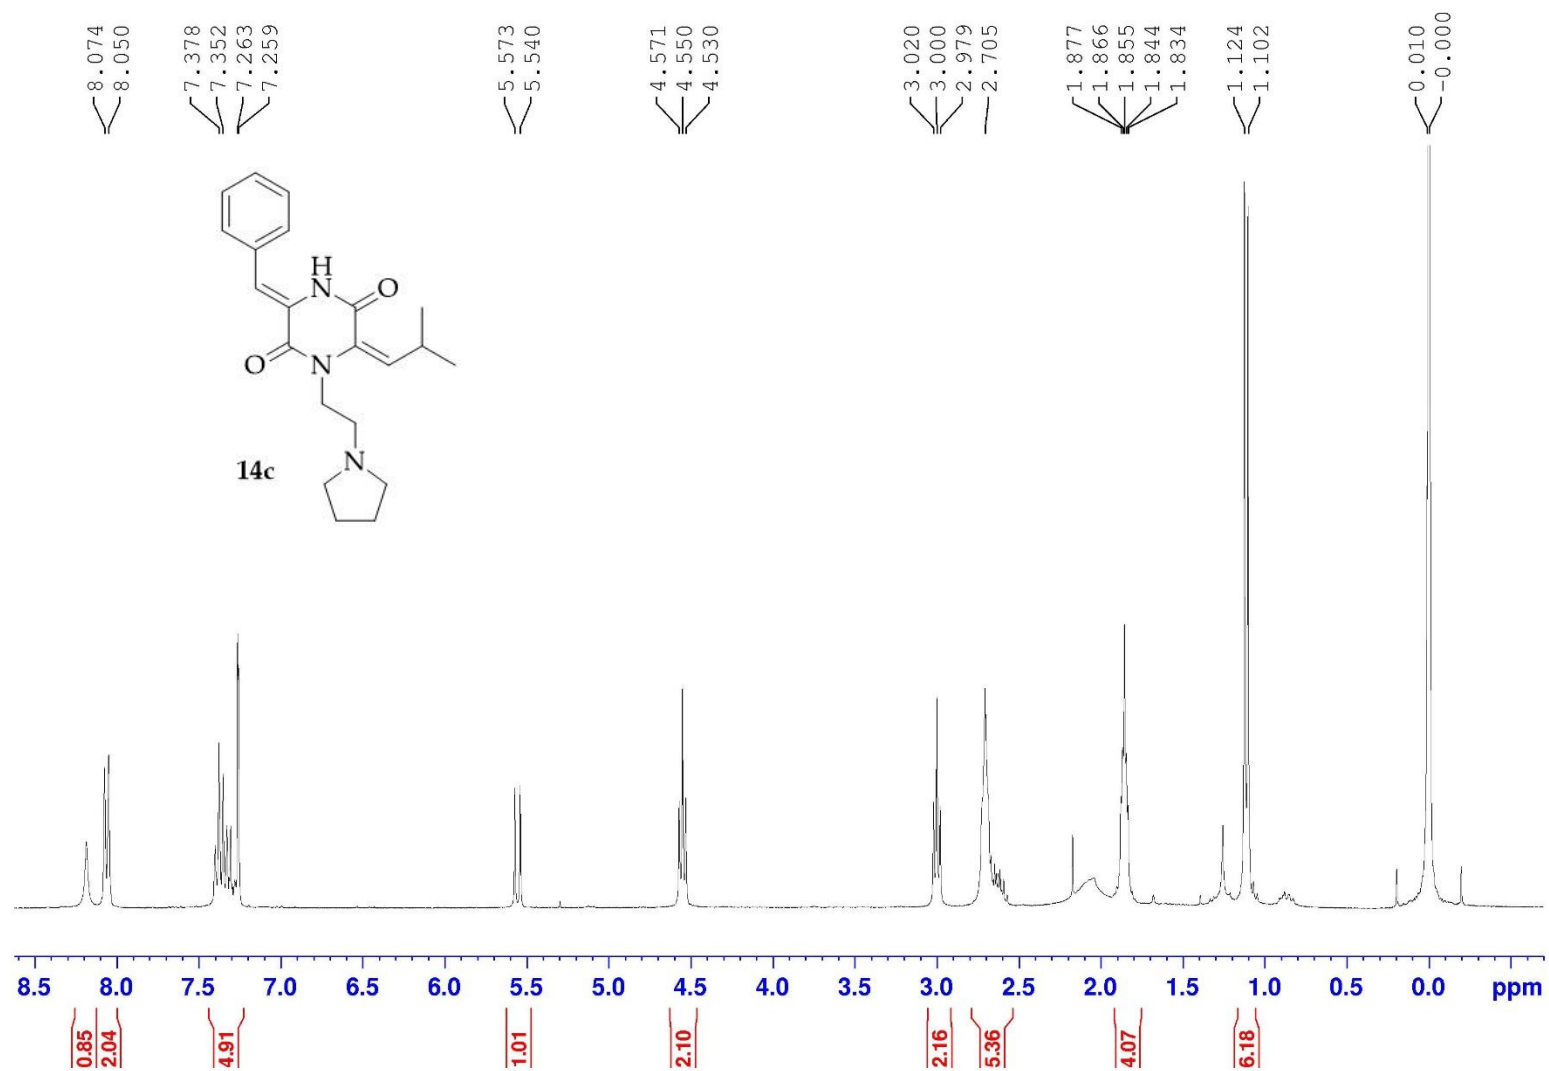

**Figure S37.** <sup>1</sup>H-NMR of the (3Z,6E)-3-Benzylidene-6-(2-methylpropylidene)-1-(1-ethyl pyrrolidine)-2,5-diketopiperazine (**14c**).

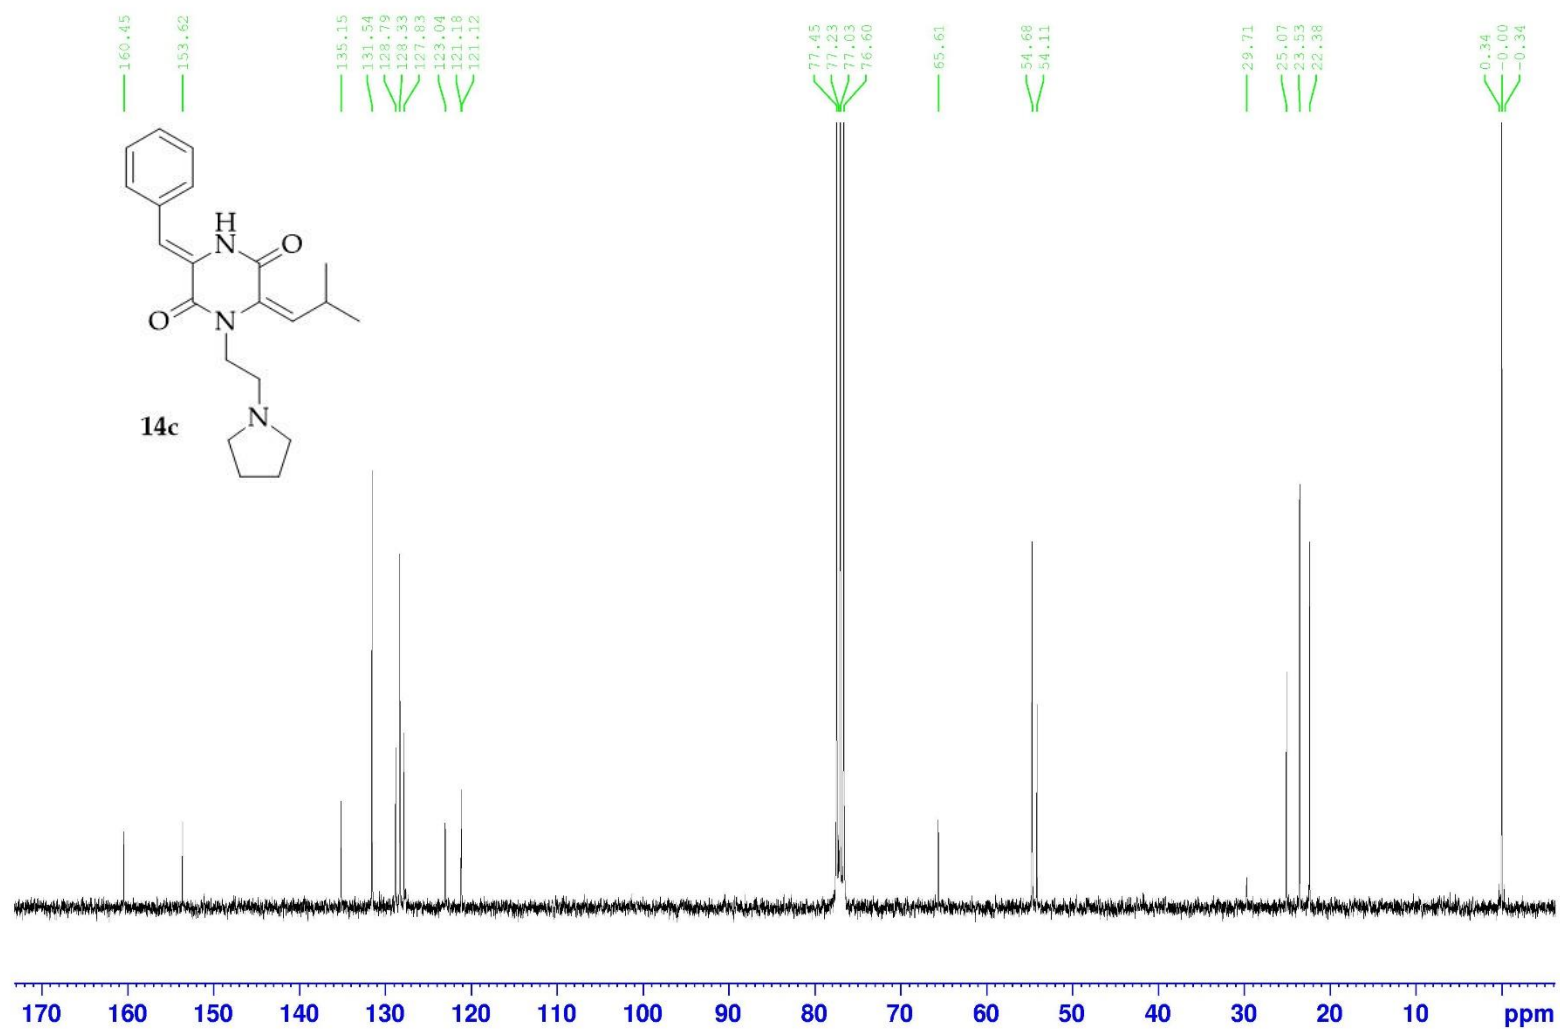

**Figure S38.** <sup>13</sup>C-NMR of the (3*Z*,6*E*)-3-Benzylidene-6-(2-methylpropylidene)-1-(1-ethyl pyrrolidine)-2,5-diketopiperazine (**14c**).

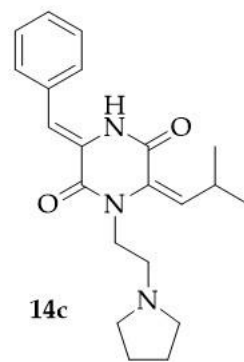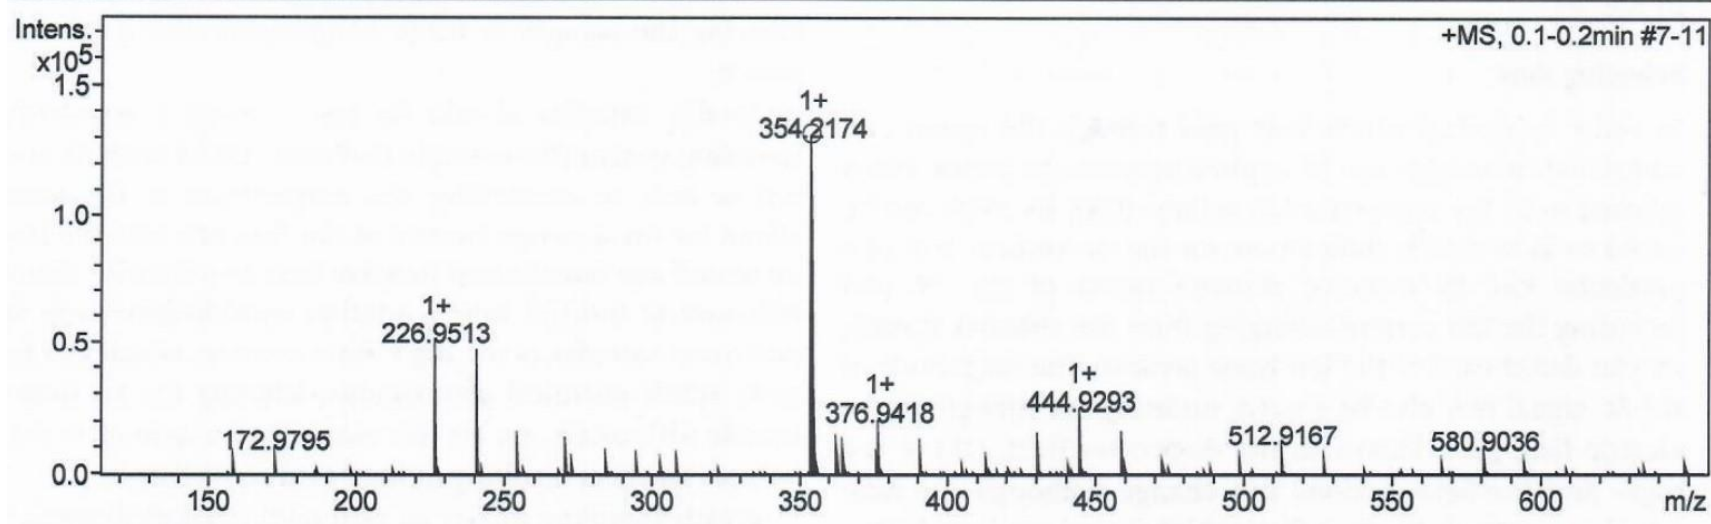

**Figure S39.** HRMS of the (3*Z*,6*E*)-3-Benzylidene-6-(2-methylpropylidene)-1-(1-ethyl pyrrolidine)-2,5-diketopiperazine (**14c**).
